# 1 Single-cell transcriptomics of malaria parasites

2 Adam J. Reid<sup>1,3</sup>, Arthur M. Talman<sup>1,3</sup>, Hayley M. Bennett<sup>1,3</sup>, Ana R. Gomes<sup>1</sup>, Mandy J. Sanders<sup>1</sup>,  
3 Christopher J. R. Illingworth<sup>2</sup>, Oliver Billker<sup>1</sup>, Matthew Berriman<sup>1</sup>, Mara K. N. Lawniczak<sup>1</sup>

4

5 <sup>1</sup>Malaria Programme, Wellcome Trust Sanger Institute, Hinxton, Cambridge, UK

6 <sup>2</sup>Department of Genetics, University of Cambridge, Cambridge, UK

7 <sup>3</sup>These authors contributed equally to this work.

8 Correspondence should be addressed to AJR ([ar11@sanger.ac.uk](mailto:ar11@sanger.ac.uk)), AMT ([at10@sanger.ac.uk](mailto:at10@sanger.ac.uk)) or

9 MKNL ([mara@sanger.ac.uk](mailto:mara@sanger.ac.uk))

10

## 11 Abstract

12 Single-cell RNA-sequencing is revolutionising our understanding of seemingly homogeneous cell  
13 populations, but has not yet been applied to single cell organisms. Here, we established a method to  
14 successfully investigate transcriptional variation across individual malaria parasites. We discover an  
15 unexpected, discontinuous program of transcription during asexual growth previously masked by  
16 bulk analyses, and uncover novel variation among sexual stage parasites in their expression of gene  
17 families important in host-parasite interactions.

18

## 19 Main text

20 Single-cell RNA-sequencing (scRNA-seq) has revealed astounding cell-to-cell heterogeneity,  
21 uncovered previously unknown cell types, and enhanced our understanding of developmental  
22 pathways in mammals <sup>1</sup>. However, unicellular organisms have not yet been successfully explored  
23 using this method. Variation in the behaviour and developmental decision making of individual  
24 unicellular organisms cannot be resolved when averaging across populations of individuals. In  
25 *Plasmodium* parasites, transcriptomic analyses of isogenic strains grown under homogenous  
26 conditions revealed extensive transcriptional variation particularly among genes associated with  
27 host-parasite interactions <sup>2</sup>. Furthermore, disease-relevant phenotypes such as commitment to  
28 sexual development <sup>3,4</sup>, parasite sequestration <sup>5</sup> and nutrient acquisition <sup>6</sup> are thought to be driven  
29 by transcriptional variation between individual parasites.

30

31 Compared to mammalian cells, *Plasmodium* parasites present several challenges to existing single  
32 cell technologies, including much lower RNA content and a highly AT-biased base composition <sup>7</sup>.  
33 Initially we trialled the well-established Smart-seq2 method <sup>8</sup> on sorted, *Plasmodium falciparum*-  
34 infected single red blood cells (Fig. 1a), but we increased the number of amplification cycles from 12

35 to 30 to account for their low RNA content. However, on average only 10% of reads mapped to  
36 genes in the parasite genome and more than half of these mapped to rRNA genes (Fig. 1b, left most  
37 bar). To improve yield, we used qPCR to evaluate the impact of modifying the anchor and length of  
38 the oligo(dT) primer, the reverse transcription enzyme, and the number of amplification cycles (Fig.  
39 1c). A longer, unanchored polyT primer (T30) significantly improved yield (Fig. 1c), and was used in  
40 all further experiments. The reverse transcriptase enzymes SuperScript II and SMARTScribe gave the  
41 greatest yields by qPCR (Fig. 1c). Amplification by 25 and 30 cycles appeared equivalent by qPCR (Fig.  
42 1c). Therefore we sequenced libraries generated from a small number of individual cells using the  
43 best two enzymes and either 25 or 30 cycles of PCR (Fig. 1b). The SMARTScribe enzyme with 25 or 30  
44 cycles provided the best results, significantly increasing the number of genes detected and  
45 dramatically reducing the rRNA contamination (Fig. 1b; Supplementary Table 1). Given equivalent  
46 results for 25 or 30 cycles we opted to use fewer cycles for subsequent experiments. Transcript  
47 coverage was not affected by GC content or length; long genes were just as well detected as short  
48 genes, although we detected a slight 5' bias in transcript coverage (Supplementary Figure 1). To  
49 validate our sorting protocol, a mixed population of *P. falciparum* and *P. berghei* schizonts were  
50 individually sorted into wells (n=72 cells). Reads from each parasite matched the expected species  
51 based on fluorescence suggesting that there was little cross cell contamination due to lysis (Fig. 1d;  
52 Supplementary Figure 2).

53  
54 To begin to explore variation within parasite life cycle stages we generated 144 high quality single  
55 cell transcriptomes of mixed asexual and sexual (gametocyte) blood stage parasites of the rodent  
56 malaria model *P. berghei*. We identified expression from, on average, 1981 genes per cell,  
57 representing 33% of the total genes in the genome, on par with mammalian single cell experiments<sup>9</sup>  
58 (Supplementary Table 1; Supplementary Figure 3). Using a combination of Principal Components  
59 Analysis (PCA), k-means clustering<sup>10</sup> and comparison to bulk transcriptome datasets<sup>11,12</sup>, we  
60 classified each cell as male, female, or asexual (Fig. 2a). The accuracy of our classification was  
61 strongly supported by established stage-specific markers (Fig. 2b). In addition to capturing sufficient  
62 transcriptional complexity to classify cells, we were also able to identify novel marker transcripts for  
63 each parasite stage (Supplementary Data 1).

64  
65  
66  
67  
68

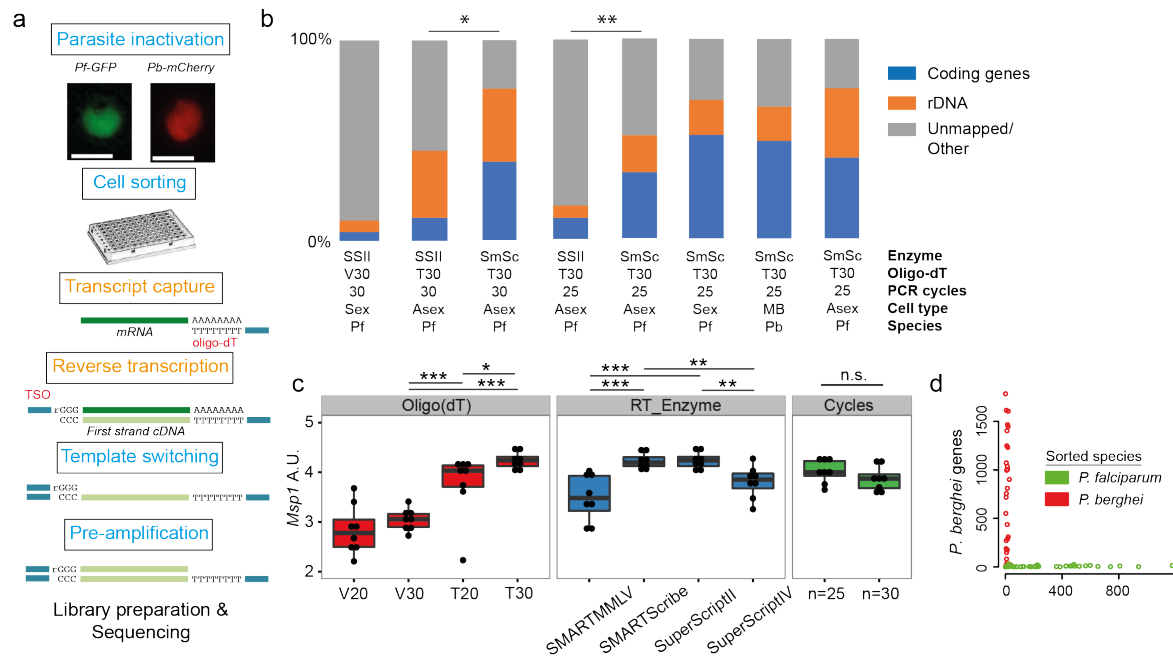

69

70

71 **Figure 1. Establishment of a robust protocol for single cell transcriptomic analysis of Plasmodium parasites.**

72 (a) Overview of the single cell RNAseq protocol. Steps in the original Smart-seq2 protocol<sup>8</sup> that resulted in  
 73 significant gains are highlighted in orange. (b) Relative numbers of reads mapping to coding RNA and rDNA for  
 74 each trial, averaged over all cells in that trial. The final three bars represent the main *P. falciparum*  
 75 gametocyte, *P. berghei* mixed blood and *P. falciparum* asexual datasets, respectively. Asterisks indicate  
 76 selected significant differences between proportions of reads mapping to coding genes, calculated using Mann-  
 77 Whitney U. (c) The protocol was evaluated using qPCR of the *msp-1* transcript (PF3D7\_09303000) on sorted  
 78 pools of 10 asexual parasites (n=8) (Significance from Mann Whitney test). The following reagents were tested:  
 79 Oligo(dT)s containing a terminal anchoring base (A,G,C; V) or not (T) and of varying lengths (20 Ts vs. 30 Ts); 4  
 80 reverse transcriptase enzymes; 25 or 30 cycles of preamplification. (d) Individually sorted *P. falciparum* and *P.*  
 81 *berghei* cells from a mixed pool revealed no doublets and little contamination (see Supplementary Figure 2).

82

83 Whereas mature sexual parasite cells are terminally differentiated, transcriptional variation along  
 84 the 24 hour asexual cycle of *P. berghei* is thought to be continuous<sup>11,13</sup>, including during the  
 85 transition from the growth phase (trophozoite) to the budding phase (schizont).

86 We predicted the maturation state of each individual asexual cell, using a rank-correlation approach  
 87 to compare them to two published bulk RNA-seq datasets<sup>11,12</sup>. We also carried out a pseudotime  
 88 analysis<sup>14</sup> using variable genes<sup>15</sup> to order the asexual cell subset. We observed a strong  
 89 concordance between the temporal and pseudotemporal predictions (Fig. 2c and 2d). Interestingly,  
 90 we observed very abrupt transcriptional changes, distinct from the smooth transitions observed in  
 91 bulk time course experiments (Fig. 2d, Supplementary Figure 4). To further study the dynamics of  
 92 transcriptional shifts over asexual development, we analysed the transcriptomes of 155 *P.*  
 93 *falciparum* late asexual stages. These cells could also be ordered in pseudotime in agreement with  
 94 their predicted stage (Fig. 2e; Supplementary Figure 5) and displayed the same dramatic  
 95 transcriptional profile shift in the late asexual cycle (Supplementary Figure 5). The smooth

96 transitions observed in bulk data may be attributable to averaging across slightly different asexual  
97 life cycle points, which does not happen when examining single cells in pseudotime. Taking  
98 advantage of our high resolution transcriptomes, we conducted a co-expression correlation analysis  
99 of the ApiAp2 family of transcription factors (TFs) <sup>16</sup> and observed marked correlated and  
100 anticorrelated clusters in a TF network (Supplementary Figure 6). These patterns were strongly  
101 associated with peak expression along pseudotime and several correlations were conserved in both  
102 species (Supplementary Figure 6). This suggests a possible conserved regulatory framework  
103 underlying this rapid and discrete transcriptional shift in late schizogony. More comprehensive  
104 sampling of the asexual cycle will be necessary to fully evaluate the pace of transitions and the role  
105 of synergistic or antagonistic interactions between TFs in establishing the discrete patterns of gene  
106 regulation we observe during the asexual cycle of *Plasmodium* parasites.

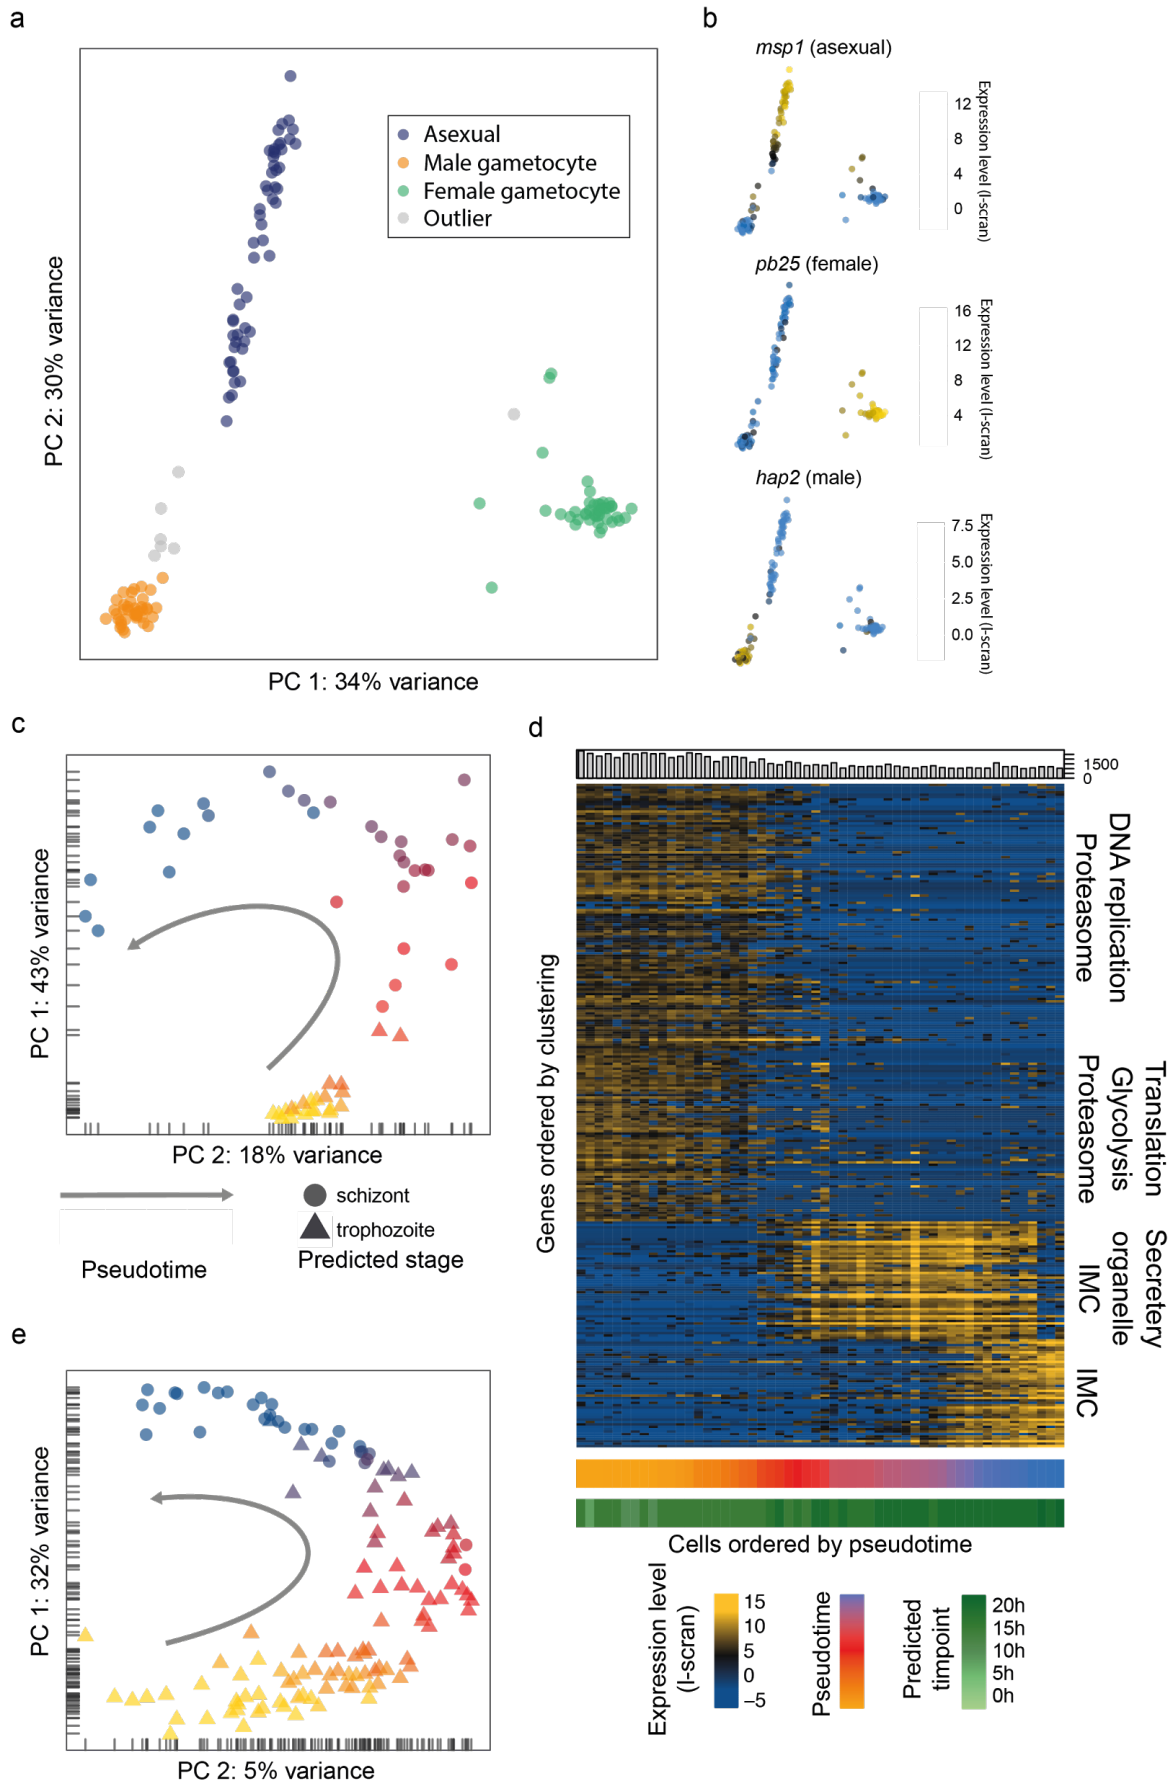

107

108

109 **Figure 2. Single cell RNA-seq allows dissection of parasite populations**

110 **(a)** A combination of Principal Components Analysis (PCA), k-means clustering and comparison to bulk RNA-seq  
111 datasets was used to classify 144 high quality *P. berghei* single cells, and revealed three distinct  
112 subpopulations. Outliers may represent erythrocytes infected with both sexual and asexual stages or early  
113 stages in gametocyte development. **(b)** Three well-established markers of the male, female and asexual  
114 lineages<sup>21-23</sup> are concordant with our classification. **(c)** Pseudotime ordering (using<sup>14</sup>) of the asexual cells in (a)  
115 was in close agreement with bulk RNA-seq datasets (predicted timepoint from<sup>11</sup>, predicted stage = consensus;  
116 see Methods). **(d)** Differentially expressed genes (identified using<sup>15</sup>) were clustered along pseudotime  
117 revealing groups of genes with abrupt expression profile changes during late asexual cycle. Functional  
118 enrichment in the clusters was in agreement with the expected shift from the growing trophozoite to the  
119 budding schizont (IMC = Inner Membrane Complex). **(e)** Pseudotime ordering (using<sup>14</sup>) of the 125 *P. falciparum*  
120 late asexual cells was in close agreement with bulk RNA-seq datasets (predicted timepoint from<sup>24</sup>, predicted  
121 stage = consensus; see Methods).  
122

123 Transcriptional variation within large gene families is known to be important for immune evasion  
124 and establishment of chronic infection by *Plasmodium* in the mammalian host<sup>17,18</sup>. However,  
125 relatively little is known about the role of these families, or host-parasite interactions more  
126 generally, in the sexual stages which are transmitted to the mosquito. We examined transcriptional  
127 variation within the four *P. berghei* life stages and found 115 variable genes in females, 73 in males,  
128 27 in trophozoites and 4 in schizonts (Supplementary Data 2). A full functional description of all  
129 variable genes is described in Supplementary Data 3. In trophozoites, we observed variation in  
130 expression of the multigene family *pir*, in particular the L-type *pir* genes<sup>18</sup>. Variation in expression of  
131 these genes has recently been associated with establishment of chronic infection<sup>18</sup>. In male  
132 gametocytes, but not females, we observed variability of S-type *pir* genes<sup>12</sup>, a group for which no  
133 function has yet been described (Fig. 3a; Supplementary Data 4). Their products however, have been  
134 identified in male gametes<sup>19</sup>, the cells that arise from male gametocytes once ingested by a  
135 mosquito. Our data suggest that sex-specific variation in expression of these genes may play a role in  
136 malaria parasite transmission.

137

138

139

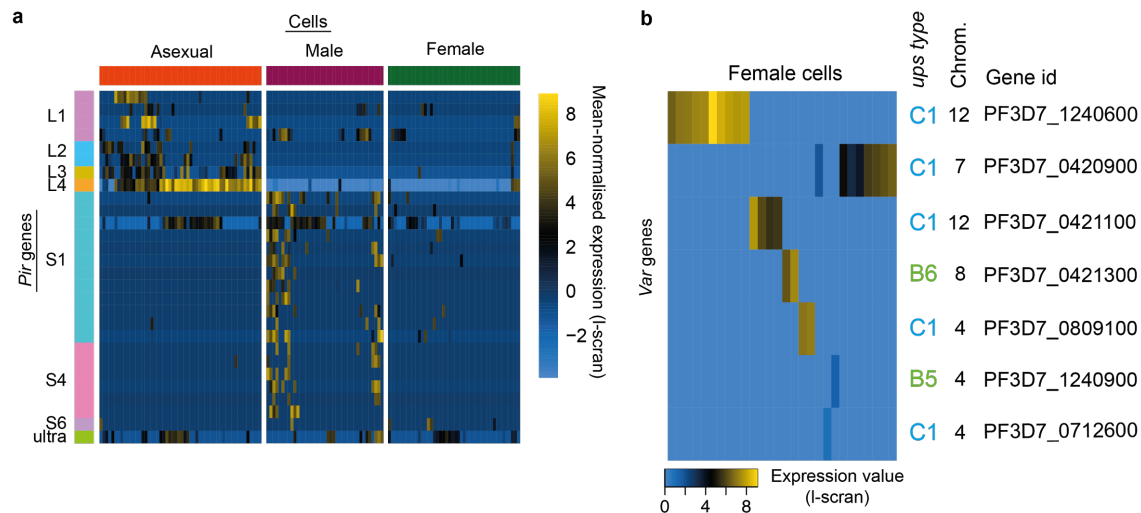

140

141 **Figure 3. Multigene families show variable expression in sexual stages of both *P. berghei* and *P. falciparum***  
 142 **(a)** *Pir* gene expression was highly variable across male gametocytes. In addition, more *pir* genes were  
 143 expressed in males than females. These are distinct subfamilies of *pir* genes from those variably expressed in  
 144 asexual stages. **(b)** 28 female *P. falciparum* gametocytes expressed *var* gene transcripts from the sense strand.  
 145 We only ever detected a single mRNA *var* in each cell, suggesting the maintenance of mutually exclusive *var*  
 146 expression in gametocytes. The promoters of expressed *var* genes were only *upsC* and *upsB* subtypes from  
 147 internal rather than subtelomeric regions of the genome.  
 148

149 To further explore transcriptional variation in sexual stage biology, we carried out scRNA-seq on *P.*  
 150 *falciparum* late sexual stage individuals, resulting in 191 high quality single cell transcriptomes  
 151 (Supplementary Table 1, Supplementary Figure 3). Due to the small number of predicted males  
 152 detected (n=5; Supplementary Figure 7), we only examined expression variation in females,  
 153 detecting 448 variable genes (Supplementary Data 2). The repertoire of multigene families in *P.*  
 154 *falciparum* is highly diverged from *P. berghei*<sup>20</sup> and clear *pir* gene orthologues do not exist. However,  
 155 we found an enrichment for variation in the well-studied *var* gene family (14 of 60 genes,  
 156 hypergeometric test,  $p = 0.0006$ ). Expression of noncoding *var* transcripts is common and is involved  
 157 in maintaining mutually exclusive expression of a single *var* gene<sup>17</sup>. Therefore, to assess the  
 158 presence of true *var* mRNAs, we identified reads that confirmed intronic splicing. We discovered that  
 159 although there were reads mapping to multiple *vars* within each cell, only a single *var* gene ever had  
 160 reads that spanned the spliced intron. This suggests that mutually exclusive expression of *var* genes  
 161 occurs in sexual stages, as it does for asexual parasites<sup>17</sup>. The *var* genes variably expressed across  
 162 females were always from internal *var* gene clusters, consisting primarily of *upsC* type *vars* (Fig. 3b)  
 163 but whose role is largely unexplored. In asexual stages, *var* gene products (PfEMP1) allow the  
 164 parasites to adhere to the host vasculature and avoid clearance in the spleen and are important in  
 165 evading the adaptive immune system<sup>17</sup>. Variable and mutually exclusive transcription of *upsC*-rich  
 166 internal *var* genes in female gametocytes suggest that this variable gene family, like the *pir* genes  
 167 above, may also play an important role in parasite transmission.



168

169 In this study, we have demonstrated a highly successful approach to single cell RNA-sequencing in  
170 the study of a unicellular eukaryotic organism. We have used scRNA-seq to successfully resolve  
171 individual parasites within a mixed population, to classify them, and to identify previously hidden  
172 transcriptional variation. Our data suggest that the transcriptional cascade during development in  
173 red blood cells is not continuous as previously described, but instead it occurs in discrete stages. This  
174 has important implications for our understanding of gene regulation in the most pathogenic stage of  
175 the parasite. We also show that variable expression of genes involved in host-parasite interactions is  
176 a feature of multiple life stages of *Plasmodium* parasites. We hope that our optimisation framework  
177 will assist in extending scRNA-seq to a much wider range of diverse eukaryotic cell types.

178

179

180

181

182

183

## 184 **Methods**

### 185 **Isolation of *P. berghei* parasites**

186 The constitutively mCherry-expressing *P. berghei* ANKA line, clone RMgm-928<sup>25</sup>, was propagated in  
187 a female 6- to 8-week-old Theiler's original outbred mouse supplied by Envigo UK. Parasites were  
188 purified from an overnight (20h) 50 mL culture of 1 mL of infected blood using a 55% Histodenz  
189 cushion (SIGMA), following an established schizont purification protocol detailed elsewhere<sup>26</sup>.  
190 Purified late stages (asexual and sexual) were pelleted at 450g for 3 minutes and incubated with 500  
191  $\mu$ L of RNALater (ThermoFisher) for 5 minutes, and further diluted into 3 mL of 1x PBS prior to cell  
192 sorting. All animal research was conducted under licenses from the UK Home Office and used  
193 protocols approved by the ethics committee of the Wellcome Trust Sanger Institute.

194

### 195 ***In vitro P. falciparum* culture**

196 3D7-HTGFP, a GFP-expressing *P. falciparum* strain<sup>27</sup>, was maintained in O-negative red blood cells  
197 obtained from the NHSBT, using RPMI 1640 culture medium (GIBCO) supplemented with 25 mM  
198 HEPES (SIGMA), 10mM D-Glucose (SIGMA), 50 mg/L hypoxanthine (SIGMA), 10% human serum  
199 (obtained locally in accordance with ethically approved protocols), and gassed using a mix containing  
200 5% O<sub>2</sub>, 5% CO<sub>2</sub> and 90% N<sub>2</sub>. Parasites were highly synchronised using two consecutive cycles of  
201 Percoll-Sorbitol treatment<sup>28</sup>. Late asexual parasites (trophozoites and schizonts) were purified on a



202 cushion of 63% Percoll (GE Healthcare). Stage V gametocytes were obtained using standard  
203 gametocyte culturing<sup>29</sup> and purified magnetically with an LS column<sup>30</sup> (Miltenyi Biotec). Following  
204 purification of each stage, all *P. falciparum* parasites were pelleted at 800g for 5 minutes, incubated  
205 with 500 µL of RNALater (ThermoFisher) for 5 minutes, and further diluted into 3 mL of 1x PBS prior  
206 to cell sorting. Parasitaemia was determined by Giemsa-stained thin blood smear.

207

#### 208 **Cell sorting**

209 4 µl of lysis buffer (0.8 % of RNase-free Triton-X (Fisher) in nuclease-free water (Ambion)), UV-  
210 treated for 30 min with a Stratalinker UV Crosslinker 2400 at 200, 000 µJ/cm<sup>2</sup>, 2.5 mM dNTPs (Life  
211 Technologies), 2.5 µM of oligo(dT) (IDT; see Supplementary Table 1 for detail) and 2U of  
212 SuperRNAsin (Life Technologies) were dispensed into each well of the recipient RNase-free 96-well  
213 plate (Abgene) immediately prior to the sort and kept on ice. In the first experiment only 2 µl of lysis  
214 buffer were used but the observed cell-capture efficiency was very poor so the volume was  
215 increased. Cell sorting was conducted on an Influx cell sorter (BD Biosciences) with a 70 µm nozzle.  
216 Parasites were sorted by gating on single cell events and on GFP (*P. falciparum*) or mCherry (*P.*  
217 *berghei*) fluorescence. A non-sorted negative control well and a positive 100-cell control well were  
218 included in every plate alongside single cells. Sorted plates were spun at 200 G for 10 seconds and  
219 immediately placed on dry ice.

220

#### 221 **First and second strand cDNA synthesis and pre-amplification**

222 Cells in plates were incubated at 72 °C for 3 minutes. A reverse transcription master mix was added  
223 to the samples containing 1 µM of LNA-oligonucleotide (5'-  
224 AGCAGTGGTATCAACGCAGAGTACATrGrG+G-3'; Exiqon), 6 µM MgCl<sub>2</sub>, 1M Betaine (Affymetrix), 1X  
225 reverse transcription buffer, 50 µM DTT, 0.5 U of SuperRNAsin, and 0.5 µl of reverse transcriptase  
226 (Supplementary Table 1). The total volume of the reaction was 10µl. The plate was incubated using  
227 the following programme 1 X 42°C/90'; 10 X (42°C/2', 50°C/2'), 1 X 70°C/15'. Samples were then  
228 supplemented with 1X KAPA Hotstart HiFi Readymix and 2.5 µM of the ISO SMART primer<sup>8</sup> and  
229 incubated using the following cycling programme 1 X 98°C/ 3'; 25 or 30 X (98°C/20'', 67°C/15'',  
230 72°C/6'); 1x 72°C/ 5' (Supplementary Table 1). Samples were then purified with 1X Agencourt  
231 Ampure beads (Beckman Coulter) in a Zephyr G3 SPE Workstation (Perkin Elmer) according to the  
232 manufacturer's recommendation. Amplified cDNA was eluted in 10 µl nuclease-free water. Details of  
233 different permutations of the protocol tested during the optimisation process are given in  
234 Supplementary Table 1.

235

## 236 **Quality control of cDNA samples**

237 The quality of a subset of amplified cDNA samples was monitored with the high-sensitivity DNA chip  
238 on an Agilent 2100 Bioanalyser. Samples were verified by qPCR using LightCycler 480 SYBR Green I  
239 Master and MSP-1 primers at a concentration of 0.4  $\mu$ M (Forward: 5'-  
240 TCCCAATCAGGAGAAACAGAAG-3'; Reverse: 5'-GATGGTTGTGTTGGTGGTAATG-3'), on a Roche  
241 Lightcycler 480 II. Reactions were incubated according to the following cycling programme: 1x  
242 95°C/10'; 45X (98°C/20'', 58°C/10'', 68°C/30''). Transcripts were quantified with the absolute  
243 quantification method using a standard dilution.

244

## 245 **Library preparation and sequencing**

246 Libraries were prepared using the Nextera XT kit (Illumina) according to manufacturer  
247 recommendations. 96 or 384 different index combinations were used to allow multiplexing during  
248 sequencing. After indexing, libraries were pooled for clean-up at a 4:5 ratio of Agencourt Ampure  
249 beads (Beckman Coulter). Quality of the libraries was monitored with the high sensitivity DNA chip  
250 on an Agilent 2100 Bioanalyser. Empty-well controls and single cells were pooled separately from  
251 100 cell controls and loaded proportionally to their expected cell content for sequencing on an  
252 Illumina MiSeq or HiSeq 2500.

253

## 254 **Sequencing of single-cell libraries**

255 The original Smart-seq2 protocol with the Superscript II enzyme and the original oligo(dT) with an  
256 anchoring base was run with 30 PCR cycles of preamplification on 10 samples. The samples included  
257 a single no-cell control, five single *P. falciparum* gametocytes, two 10-cell controls and two 100-cell  
258 controls. These were multiplexed, along with three samples each of individual human lung  
259 carcinoma cells (A549) and sequenced on a single MiSeq run with 150bp paired end reads.

260

261 To test the effect of different reverse transcriptase enzymes and different numbers of PCR cycles, we  
262 sequenced *P. falciparum* schizont libraries prepared using 1) the SmartScribe enzyme (Clontech) for  
263 a) six single cells, one 100-cell control and two no-cell controls with 25 cycles of PCR, and b) six single  
264 cells and one 100-cell control with 30 cycles of PCR; and 2) the SuperScript II enzyme (Thermofisher)  
265 for a) six single cells, one 100-cell control and two no-cell controls with 25 cycles of PCR, and b) six  
266 single cells and one 100-cell control with 30 cycles of PCR. These were multiplexed on a single MiSeq  
267 run with 150bp paired end reads.

268

269 To determine whether single-cell samples might be contaminated with either additional cells or RNA  
270 from lysed cells, individual mCherry *P. berghei* (RMgm-928<sup>25</sup>) and GFP *P. falciparum*<sup>27</sup> schizonts  
271 were mixed in a 1:1 ratio, inactivated with RNALater fixation and then sorted. A multiplex library was  
272 prepared comprising 32 single *P. berghei* schizonts, two 100-cell *P. berghei* schizont controls, one no-  
273 cell control, 40 single *P. falciparum* schizonts and two 100-cell *P. falciparum* schizont controls. These  
274 libraries were sequenced as a multiplex pool on a single MiSeq run with 150bp paired end reads.

275

276 The *P. berghei* mixed blood stage samples comprised 182 single-cells of *P. berghei*, plus four no-cell  
277 controls and six 100-cell controls. These were multiplexed with another 192 samples not analysed in  
278 this work and sequenced on a single HiSeq 2500 lane using HiSeq v4 with 75bp paired end reads. The  
279 *P. falciparum* gametocyte samples were sequenced as three multiplexed pools of 84, using the same  
280 chemistry. Three technical duplicate samples were excluded from analysis. The *P. falciparum* asexual  
281 samples were sequenced as two pools of 96, each on one Illumina HiSeq 2500 lane using HiSeq v4  
282 chemistry with 75bp paired-end reads. Each batch of 96 samples contained three 100-cell controls.  
283 The second batch (lane 7) contained six samples of stage I gametocytes and six samples of stage II  
284 gametocytes, each with a single 100-cell control. These were not included in the analysis, leaving  
285 176 single cell samples.

286

### 287 **Mapping reads and calculating read counts**

288 All sequencing experiments were processed in the following way. CRAM files of reads were acquired  
289 from the WTSI core pipeline, converted to BAM using *samtools-1.2 view -b*, sorted using *samtools*  
290 *sort -n*, converted to fastq using *samtools-1.2 bam2fq* and then deinterleaved<sup>31</sup>. Nextera adaptor  
291 sequences were trimmed using *trim\_galore -q 20 -a CTGTCTCTTATACACATCT --paired --stringency 3 -*  
292 *-length 50 -e 0.1* (v0.4.1). HISAT2 (v2.0.0-beta)<sup>32</sup> indexes were produced for the *P. falciparum* v3  
293 (<http://www.genedb.org/Homepage/Pfalciparum>) or *P. berghei* v3<sup>33</sup> genome sequences,  
294 downloaded from GeneDB<sup>34</sup>, using default parameters (October 2016). Trimmed, paired reads were  
295 mapped to either genome sequence using *hisat2 --max-intronlen 5000 -p 12*. For the dual sort  
296 experiment we mapped against a combined reference, allowing us to exclude reads that map to  
297 both genomes. SAM files were converted to BAM using *samtools-1.2 view -b* and sorted with  
298 *samtools-1.2 sort*. GFF files were downloaded from GeneDB (October 2016) and converted to GTF  
299 files using an in-house script. All feature types (mRNA, rRNA, tRNA, snRNA, snoRNA,  
300 pseudogenic\_transcript and ncRNA) were conserved, with their individual “coding” regions labelled  
301 as CDS in every case for convenience. Where multiple transcripts were annotated for an individual  
302 gene, only the primary transcript was considered. Reads were summed against genes using HTSeq:

303 *htseq-count -f bam -r pos -s no -t CDS* (v0.6.0;<sup>35</sup>). Multimapping reads were excluded by default (-a  
304 10). For downstream analysis (excluding examination of rRNA counts) transcripts not included in the  
305 GeneDB cDNA sequence files were excluded. The read counts for *P. berghei* mixed blood stages, *P.*  
306 *falciparum* gametocytes and *P. falciparum* asexual stages are presented in Supplementary Data 6.

307

### 308 **Classifying reads for quality control**

309 To determine the useful yield of different RNA amplification protocols (summarized in  
310 Supplementary Table 1), we classified resulting reads into those mapping to rRNA genes, other  
311 genes, unmapped or ambiguous (falling into more than one category). We concentrated here on  
312 rRNA because we had observed that this was a particular problem. To do this we began with HISAT2  
313 BAM files produced as described above. Total read pairs were all the unique read pair ids. Ribosomal  
314 RNA reads were counted using *bedtools intersect* (v2.17.0;<sup>36</sup>) to find the overlap of unique read pair  
315 ids with rRNA features. Other coding reads were counted in the same way, but looking for overlap  
316 with all other features. Unmapped reads were identified using *samtools view -f 0x8* (v1.2) and  
317 extracting unique read pair ids. Where a read pair occurred in more than one of these lists, it was  
318 counted as ambiguous.

319

320 We compared the library complexity of different iterations of our protocol in order to determine  
321 whether more reads resulted in more complexity, or simply more reads from the same genes,  
322 perhaps due to large numbers of PCR cycles. Different sequencing runs had very different library  
323 sizes and so we downsampled the data. To maximise the number of cells included, while also  
324 allowing a reasonable number of reads per cell, we chose to downsample to 50000 reads per cell. To  
325 do this, 50000 counts from HTSeq were randomly sampled for each cell. Counts associated with  
326 protein coding genes were enumerated and genes were called as detected if there were at least 10  
327 reads mapping to them.

328

### 329 **Assessing bias in single-cell sequencing libraries**

330 Different library preparation and sequencing protocols exhibit different biases in representation of  
331 GC/AT-rich sequences and 5' or 3' transcript ends. In order to assess such biases we took an  
332 approach of using the mapped RNA-seq data to identify fragments of genes which were expressed  
333 and examined the coverage of genes by these fragments. The reason for doing this, rather than  
334 looking at coverage depth was that we had noticed that genes often did not have full coverage,  
335 particularly when very long or expressed at a low level. This suggests that, although we would expect  
336 Smartseq-2 to amplify full length transcripts, in some cases only partial transcripts survived the full

337 protocol. We used Stringtie (v1.2; default options;<sup>37</sup>) to call expressed fragments from our HISAT2  
338 BAM files. We then looked for Stringtie transcript features overlapping each mRNA feature in our  
339 reference annotation. Where multiple Stringtie transcripts overlapped each other, these were  
340 merged. We then determined, for each gene, the exonic sequence covered by the merged Stringtie  
341 transcripts. The length, GC content and relative start and end of these regions was calculated.  
342 Observed GC content was compared against the GC content for the whole coding region. Each  
343 relative position along a coding sequence (0-100) covered by a fragment was incremented for each  
344 fragment covering it. The coverage of each relative position for each gene was then normalised  
345 between 0 and 1 based on the highest coverage across that coding sequence. To examine the effect  
346 of gene length, we compared the length distribution of all 4943 *P. berghei* genes used in our initial  
347 analysis to the 4579 which passed our filtering criteria (having at least 10 reads in at least 5 cells).

348

#### 349 **Analysis of contamination with a dual sort of *P. falciparum* and *P. berghei* schizonts**

350 Reads for the dual sort samples were mapped as above, but to a combined reference of both  
351 parasites, enabling reads that map equally well to both genomes to be discarded as their origin could  
352 not be determined. Read counts were converted to FPKMs and transcripts with an FPKM  $\geq 10$  were  
353 counted as expressed. We used these data to show that no well contained more than one cell, i.e.  
354 wells with good data (a large number of expressed genes) never had similar numbers of genes from  
355 both species. Furthermore no good wells contained a large number of genes from the incorrect  
356 species. To explore whether contaminating genes were similar in different wells, we compared *P.*  
357 *falciparum* genes identified in wells with a *P. berghei* cell sorted into them and vice versa between  
358 wells. Similarity was calculated as the number of common contaminating genes with an FPKM  $\geq 10$ ,  
359 divided by the average number of contaminating genes between the two wells. Each cell contained  
360 relatively few contaminating genes. This was higher for *P. falciparum* contamination of *P. berghei*  
361 (Supplementary Figure 2b) than *P. berghei* contamination of *P. falciparum* (Supplementary Figure  
362 2c), suggesting *P. falciparum* cells contribute more to extracellular RNA in the medium. Different  
363 cells shared relatively few contaminating transcripts, but the more commonly occurring  
364 contaminants were also more highly expressed in their cells of origin (Supplementary Figures 2d,e).  
365 The contamination in cells was generally very low and reflected the amount of RNA present in the  
366 cells of origin.

367

#### 368 **Filtering and normalisation of single-cell read count data**

369 The three main datasets (Pb mixed, Pf asex, Pf sex) were processed using Scater v1.0.4<sup>38</sup>. Firstly we  
370 removed genes with no counts in any cell. We then removed remaining control cells, cells with a

371 total of less than or equal to 25000 read counts and/or less than 1000 genes with at least one read.  
372 Subsequently we removed genes which did not have at least 10 reads in 5 cells. For the *P. berghei*  
373 dataset this resulted in 144/183 cells and 4579 unique genes detected across all cells. For the *P.*  
374 *falciparum* gametocyte dataset there were 191/238 cells and 4454 unique genes after filtering and  
375 for the *P. falciparum* asexual dataset 161/180 cells and 4387 unique genes. The counts were then  
376 normalised using *scran*<sup>39</sup> (v1.0.3). Normalisation is required due to technical variation between  
377 samples due to, for example, variable sequencing depth and capture efficiency. Single cell RNA-seq  
378 read count data contain many zeroes compared to bulk RNA-seq data. These are caused by drop out  
379 of low expressed genes or variation between cells and reduce the accuracy of normalisation  
380 methods designed for bulk RNA-seq data. *Scran* uses a pooling approach to reduce these zeroes.  
381 Furthermore, it allows an initial clustering of the data and normalisation within these clusters (e.g.  
382 cell types), prior to a final normalisation step across the whole dataset. This is particularly useful for  
383 our *P. berghei* data, where the asexual, male and female gametocyte cells differ greatly in their  
384 expression patterns. The initial clustering step was performed with the *scran* function *quickCluster*  
385 (min.size = 30). This resulted in three clusters representing the asexual, male and female gametocyte  
386 populations. The *computeSumFactors* function was run using these clusters, with sizes = 20 and  
387 positive = TRUE. All downstream analyses were performed with the *scran* normalised data except  
388 where stated. For *P. falciparum* gametocytes, the *computeSumFactors* function was run with sizes =  
389 15. For *P. falciparum* asexual stages, we set min.size = 20 for *quickCluster* and the  
390 *computeSumFactors* function was run with sizes = 10.

391  
392 For some applications it is necessary to normalise the data by transcript length. For instance, when  
393 comparing ranked gene expression values to reference data for determining life cycle stage of a cell.  
394 We therefore normalised the *scran* values by taking the exponent ( $2^x$ ), multiplying by 1000 and  
395 dividing by the cDNA length, determined from the GeneDB cDNA FASTA file (coding sequence only,  
396 no UTRs). This is similar to the FPKM calculation, except the library size normalisation is already  
397 accomplished. We refer to these values as *l-scran*, for length-normalised *scran* values.

398

### 399 **Determining parasite life cycle stages using bulk reference data and clustering**

400 We used several bulk RNA-seq data sets to assign a life cycle stage to each cell. For *P. berghei*  
401 asexual stages we used microarray data<sup>11</sup> that captures the 24-hour asexual development cycle at  
402 two-hour resolution. In their experiment Cy5 was used to label each time point while Cy3 was used  
403 to label a pool of all samples. The “F635 Median - B635” values are the difference in Cy5 intensity  
404 between the median foreground and the median background. This intensity value is related to the



405 actual expression level and these are the values we used. Their data were generated using the *P.*  
406 *berghei* v2 genome assembly, so we remapped their probe sequences against v3 using HISAT2  
407 (default parameters). We then used `htseq-count -a 200 -f sam -r name -s no` to identify the genes to  
408 which the probes mapped (`cut -f1,21 probes_berghei_htseq.sam | grep PBANKA | grep -v`  
409 `ambiguous > probes_berghei.map`). We then used the GPR files provided from ArrayExpress <sup>40</sup>  
410 (accession GSE80015) and the probe map to produce a table of percentile ranks for each gene in  
411 each condition.

412  
413 Single cell gene expression values were converted to length normalised scran values (l-scran), as  
414 described above, in order to produce more accurate rank expression levels for our scRNA-seq data.  
415 We compared each single-cell expression profile against each reference data set. To reduce noise,  
416 genes that do not vary greatly between conditions in the reference data were removed. For the *P.*  
417 *berghei* 24h intraerythrocytic developmental cycle reference data <sup>11</sup>, genes were only included if  
418 their expression profile had a mean rank of greater than 30 and less than 70 and standard deviation  
419 in rank across samples of greater than 3. Genes from the query dataset with l-scran < 3 were also  
420 removed. A minimum of 100 remaining genes common to both the reference and query profiles  
421 were required to calculate a correlation between them. The Spearman rank correlation was used in  
422 order make the microarray and RNA-seq datasets more comparable. The best correlation of a single-  
423 cell expression profile with a reference expression profile was taken as the consensus stage  
424 prediction for that single-cell. As new data (e.g. single-cell analysis of timepoints across the full,  
425 synchronised erythrocytic development cycle) become available, benchmarking staging algorithms  
426 will become feasible. Bulk RNA-seq data to classify *P. berghei* males and females directly was not  
427 available. Therefore, we used bulk RNA-seq data <sup>12</sup> that includes mixed-sex gametocyte samples,  
428 after converting the profiles to v3 using previous id annotation from PlasmoDB <sup>41</sup>.

429  
430 To determine distinct groups of single-cells based on their expression patterns we used the  
431 clustering tool SC3 <sup>10</sup>. We used the combined Euclidean, Pearson and Spearman distance, plus the  
432 combined PCA and spectral transformation. For the *P. berghei* dataset the optimal *k* was 3 (average  
433 silhouette width = 0.99), with 4 being nearly as good (average silhouette width = 0.97). We found  
434 that the additional cluster split the asexual parasites into trophozoites and schizonts, while both *k*  
435 values retained the male and female gametocytes as separate clusters. However, there was still  
436 extensive variation within these clusters so we further investigated this by excluding asexual cells  
437 and clustering again. With this reduced dataset we were able to get a new, robust clustering with  
438 *k*=3 (width = 0.99). Here, outliers from both the putative male and female clusters clustered



439 together, exclusive of the core of male and female clusters. Markers suggested that six of these  
440 outlier cells possessed both male genes and asexual genes, while a single cell possessed both female  
441 genes and asexual genes. It is possible that these cells are early gametocytes, committed schizonts  
442 or cells doubly infected with both asexual and sexual parasites. These were excluded from further  
443 analysis. The *markers* function of SC3 (AUROC threshold 0.85, p-value threshold 0.01) was used on  
444 the initial clustering, with  $k = 3$ , to identify novel markers for asexuals, males and females.

445

446 Data from Lasonder and colleagues<sup>42</sup> was used to classify *P. falciparum* gametocyte cells by sex. Raw  
447 count data was downloaded from the Gene Expression Omnibus<sup>43</sup> (accession GSE75795) and  
448 converted to FPKM. Data from Young and colleagues<sup>44</sup>, was used to classify *P. falciparum* cells along  
449 the gametocyte development time course (days 1, 2, 3, 6, 8, 12). For this dataset profiles of ranks  
450 were downloaded from PlasmoDB. The Lasonder data<sup>42</sup> highlighted five male cells, with the rest  
451 called as females. The Young data<sup>44</sup> suggested that all the cells were at a consistent stage of  
452 development (eight days), although resolution is lacking at the most relevant timepoints, between  
453 eight and twelve days. The classification of each cell is listed in Supplementary Data 5.

454

455 Bulk RNA-seq data from Otto *et al.*<sup>24</sup> and Lopez-Barragan *et al.*<sup>45</sup> were used to classify 161 *P.*  
456 *falciparum* asexual stage cells. RNA-seq reads from Otto *et al.*<sup>24</sup> for the 36bp Illumina libraries only,  
457 were downloaded from the European Nucleotide Archive (accession ERX001048). They were  
458 mapped to the *P. falciparum* 3D7 genome sequence using HISAT2 v2.0.0-beta<sup>32</sup> and reads were  
459 counted using HTSeq v0.6.0<sup>35</sup>. Read counts were then converted into FPKM for subsequent analysis.  
460 RNA-seq reads from Lopez-Barragan *et al.*<sup>45</sup> were downloaded from the European Nucleotide  
461 Archive (accession SRX105940) and mapped to *P. falciparum* 3D7 transcript sequences using  
462 Bowtie2 v2.2.9 (-a -X 800;<sup>46</sup>) and eXpress v1.5.1<sup>47</sup>. The resulting read counts were converted to  
463 FPKM. The Lopez-Barragan prediction<sup>45</sup> was used as the consensus prediction, the prediction  
464 included 6 stage II gametocytes which were removed from further pseudotime analysis (n=155).

465

#### 466 **Assessment of gene expression variation during asexual maturation**

467 Within the 54 *P. berghei* cells identified as asexual, 277 genes were found to be variable using  
468 M3Drop<sup>15</sup> (raw count input, False Discovery Rate  $\leq 0.01$ ). L-scran expression values for this subset  
469 of genes (`expressionFamily=tobit()`) was used to order the cells in pseudotime using Monocle 2<sup>14</sup>;  
470 specifically the `reduceDimension()` and `orderCells (num_path=2)` functions were used to derive the  
471 ordering of the cells. Monocle 2 identified a single cell state and the cells were ordered in a single  
472 trajectory (Fig. 2c). The Monocle 2 package was further used to cluster genes in pseudotime ( $k$ -

473 means) with the clusterGenes() function. We looked for enrichment of Gene Ontology terms within  
474 the four clusters identified, using topGO<sup>48</sup> (summarized in Fig. 2d).

475

476 For the *P. falciparum* 155 cell dataset, 361 genes were found to be variable genes with M3Drop (raw  
477 count input, False Discovery Rate  $\leq 0.01$ )<sup>15</sup>, Monocle 2 identified 2 branches defining three possible  
478 trajectories, although 2 of those appeared minor (Supplementary Figure 5). Cells ordered in these  
479 minor trajectories did not seem to correlate with known biological markers, such as sexual  
480 commitment markers (*ap2-g* and *gvd-1*; Supplementary Figure 5) and were removed for the rest of  
481 the analysis. The pseudotime analysis was repeated on the main trajectory cells (125 cells)  
482 (Supplementary Figure 5). The Monocle 2 package was further used to cluster genes in pseudotime  
483 (k-means) with the clusterGenes() function.

484

#### 485 **Direct comparison of single-cells in pseudotime with bulk RNA-seq data**

486 To determine whether the same set of genes displayed different patterns across development in  
487 bulk and single-cell RNA-seq experiments we made direct comparisons between these two  
488 approaches. After ordering the *P. berghei* asexual cells by pseudotime, genes were ordered by their  
489 peak of expression based on linear (i.e. not logged), length-normalised scran expression values. To  
490 do this, expression value data, ordered by pseudotime, were normalised, then Fourier transformed,  
491 sorting transcripts according to the phase of the most prominent frequency. Signal-to-noise (S/N)  
492 ratios were calculated for each transformed signal and normalised with respect to the maximum  
493 achievable value for the dataset. Transforms with a normalised S/N of less than 0.1 were excluded  
494 from the results as lacking evidence of periodicity. The Hoo *et al.* dataset<sup>11</sup> were treated in the  
495 same way, but initially ordered by time point of collection rather than pseudotime and using  
496 intensity values as described above. This resulted in 1141 ordered genes for our single cell data and  
497 2612 genes for the Hoo data<sup>11</sup>. There were 651 shared genes, which were used to compare the two  
498 datasets.

499

500 The *P. falciparum* asexual cells were ordered differently. We used the Otto *P. falciparum* asexual  
501 development cycle time course data<sup>24</sup> as a reference. These data were processed as described  
502 above. We used the Fourier transform approach described above, with a normalised S/N ratio of 0.5  
503 to identify 4517 genes from the Otto *et al.* dataset<sup>24</sup>. We then identified 336 genes common to this  
504 list and the list of 361 differentially expressed genes identified across the 155 single cells. This  
505 approach was taken because the window of time captured by our single-cells was too narrow to  
506 identify cycling genes using the Fourier approach (all the normalised S/N ratios were very low e.g.

507 <0.05). We then generated heatmaps for the two datasets, with the genes ordered by their peak  
508 time in the Otto et al. dataset<sup>24</sup> in both cases.

509

### 510 **Determining gene expression variability within different cell types**

511 To examine gene expression variation within life stages, we used the filtered datasets and  
512 considered male, female, trophozoite and schizont cells separately. For *P. berghei*, M3Drop<sup>15</sup> was  
513 used to determine gene expression variability amongst cells with FDR  $\leq$  0.05. We identified 115  
514 variable genes in *P. berghei* females, 73 in males, 27 in trophozoites and four in schizonts. Twenty  
515 variable genes were shared between males and females. One variable gene from trophozoites and  
516 schizonts was shared: an L1 type *pir* gene (PBANKA\_0943900). Ten were shared between females  
517 and trophozoites, none between females and schizonts, four between males and trophozoites, none  
518 between males and schizonts. To examine functional classes enriched amongst variable genes we  
519 used topGO with the weight01 algorithm, the Fisher statistic, node size = 5 and False Discovery Rate  
520  $\geq$  0.05<sup>48</sup>. Gene ontology terms for *P. berghei* and *P. falciparum* genes were extracted from GeneDB  
521 EMBL files. Multigene families in *P. berghei* do not have associated Gene Ontology (GO) terms and so  
522 we used *ad hoc* hypergeometric tests to look at their enrichment. We found that *pir* genes were  
523 enriched amongst variable genes in trophozoites (2 of 135, hypergeometric test,  $p=0.04$ ), schizonts  
524 (1 of 135, hypergeometric test  $p=0.005$ ) and males (5 of 135, hypergeometric test,  $p=0.02$ ), but there  
525 were none in females. Those in asexual stages (trophozoites and schizonts) were from the L1  
526 subfamily, but those in males were from the S1 and S4 subfamilies.

527

528 Many more variable genes were present in *P. falciparum* females and so we reduced the FDR cut off  
529 to 0.01 to improve specificity. We found 448 variable genes in *P. falciparum* females. We were not  
530 able to analyse variability in *P. falciparum* males because we found only five of them. Amongst  
531 several enriched GO terms were *modulation by symbiont of host erythrocyte* and *cytoadherence to*  
532 *microvasculature, mediated by symbiont protein*. These terms refer to 14 *var* genes found amongst  
533 the variable genes.

534

### 535 **Identifying putative functional *var* transcripts**

536 It is known that antisense transcripts are expressed from a bidirectional promoter in the intron of  
537 each *var* gene<sup>17</sup>. Our protocol does not preserve information about which strand is transcribed.  
538 Therefore finding that reads map to either exon of a *var* gene does not provide evidence that it is  
539 functionally expressed. In fact it may indicate that the gene is silenced. In order to identify sense  
540 transcripts, we looked for reads mapping over the single intron of each *var* gene. These reads that

541 include both exons must originate from transcripts including the intron, and thus indicate that the  
542 gene was transcribed on the sense strand, not from antisense transcripts beginning within the  
543 intron. Initially we identified reads from the HISAT2 mappings which overlapped annotated *var*  
544 genes using *bedtools intersect*. From the resulting BAM file we selected those reads which included  
545 an *N* in the CIGAR string, indicating a split read. We then looked for which *var* gene each read  
546 overlapped and whether it was split exactly over the intron. We called expression for a *var* gene  
547 where there were at least two reads mapping over the intron.

548

#### 549 **Code availability**

550 Perl, R and C++ code for various analyses is available on request.

551

#### 552 **Data Availability**

553 The single-cell RNA-seq reads are available from the European Nucleotide Archive (accession  
554 ERP021229) and ArrayExpress (accession E-ERAD-611). Read counts and metadata are also  
555 presented in Supplementary Data 5 and 6.

556

#### 557 **Acknowledgements**

558 The Wellcome Trust Sanger Institute is funded by the Wellcome Trust (grant WT098051). CJRI was  
559 supported by a Sir Henry Dale Fellowship, jointly funded by the Wellcome Trust and the Royal  
560 Society (Grant Number 101239/Z/13/Z). MKNL is supported by an MRC Career Development Award  
561 (G1100339). We thank Chris Newbold and John Marioni for comments that improved the  
562 manuscript. The authors would like to thank the staff of the Illumina Bespoke Sequencing and Core  
563 Cytometry teams at the Wellcome Trust Sanger Institute for their contribution.

564

565 The authors declare no conflict of interest.

566

#### 567 **Contributions**

568 AJR, AMT, HMB and MKNL conceived of and designed the study. AMT and HMB carried out the  
569 sorting and library preparation protocols. AMT and ARG performed the parasitological experiments.  
570 AJR, AMT and HMB designed the sequencing experiments. AJR and AMT analysed the data. CJRI  
571 performed the Fourier transform analysis. MJS coordinated sequencing experiments. OB supervised  
572 ARG. AJR, AMT, MB & MKNL wrote the manuscript. All authors read and critically revised the  
573 manuscript.

574

## 575 References

- 576 1. Saliba, A.-E., Westermann, A. J., Gorski, S. A. & Vogel, J. Single-cell RNA-seq: advances and  
577 future challenges. *Nucleic Acids Res.* **42**, 8845–8860 (2014).
- 578 2. Rovira-Graells, N. *et al.* Transcriptional variation in the malaria parasite *Plasmodium falciparum*.  
579 *Genome Res.* **22**, 925–938 (2012).
- 580 3. Sinha, A. *et al.* A cascade of DNA-binding proteins for sexual commitment and development in  
581 *Plasmodium*. *Nature* **507**, 253–257 (2014).
- 582 4. Kafsack, B. F. C. *et al.* A transcriptional switch underlies commitment to sexual development in  
583 malaria parasites. *Nature* **507**, 248–252 (2014).
- 584 5. Tembo, D. L. *et al.* Differential PfEMP1 expression is associated with cerebral malaria pathology.  
585 *PLoS Pathog.* **10**, e1004537 (2014).
- 586 6. Sharma, P. *et al.* An epigenetic antimalarial resistance mechanism involving parasite genes  
587 linked to nutrient uptake. *J. Biol. Chem.* **288**, 19429–19440 (2013).
- 588 7. Kissinger, J. C. & DeBarry, J. Genome cartography: charting the apicomplexan genome. *Trends*  
589 *Parasitol.* **27**, 345–354 (2011).
- 590 8. Picelli, S. *et al.* Smart-seq2 for sensitive full-length transcriptome profiling in single cells. *Nat.*  
591 *Methods* **10**, 1096–1098 (2013).
- 592 9. Treutlein, B. *et al.* Reconstructing lineage hierarchies of the distal lung epithelium using single-  
593 cell RNA-seq. *Nature* **509**, 371–375 (2014).
- 594 10. Kiselev, V. Y. *et al.* SC3 - consensus clustering of single-cell RNA-Seq data. *bioRxiv* 036558  
595 (2016). doi:10.1101/036558
- 596 11. Hoo, R. *et al.* Integrated analysis of the *Plasmodium* species transcriptome. *EBioMedicine* **7**,  
597 255–266 (2016).
- 598 12. Otto, T. D. *et al.* A comprehensive evaluation of rodent malaria parasite genomes and gene  
599 expression. *BMC Biol.* **12**, 86 (2014).
- 600 13. Bozdech, Z. *et al.* Expression profiling of the schizont and trophozoite stages of *Plasmodium*

- 601           falciparum with a long-oligonucleotide microarray. *Genome Biol.* **4**, R9 (2003).
- 602   14. Trapnell, C. *et al.* The dynamics and regulators of cell fate decisions are revealed by  
603       pseudotemporal ordering of single cells. *Nat. Biotechnol.* **32**, 381–386 (2014).
- 604   15. Andrews, T. S. & Hemberg, M. Modelling dropouts allows for unbiased identification of marker  
605       genes in scRNASeq experiments. doi:10.1101/065094
- 606   16. Campbell, T. L., De Silva, E. K., Olszewski, K. L., Elemento, O. & Llinás, M. Identification and  
607       genome-wide prediction of DNA binding specificities for the ApiAP2 family of regulators from  
608       the malaria parasite. *PLoS Pathog.* **6**, e1001165 (2010).
- 609   17. Guizetti, J. & Scherf, A. Silence, activate, poise and switch! Mechanisms of antigenic variation in  
610       Plasmodium falciparum. *Cell. Microbiol.* **15**, 718–726 (2013).
- 611   18. Brugat, T. *et al.* Antibody-independent mechanisms regulate the establishment of chronic  
612       Plasmodium infection. *Nat Microbiol* **2**, 16276 (2017).
- 613   19. Talman, A. M. *et al.* Proteomic analysis of the Plasmodium male gamete reveals the key role for  
614       glycolysis in flagellar motility. *Malar. J.* **13**, 315 (2014).
- 615   20. Reid, A. J. Large, rapidly evolving gene families are at the forefront of host-parasite interactions  
616       in Apicomplexa. *Parasitology* **142 Suppl 1**, S57–70 (2015).
- 617   21. Mair, G. R. *et al.* Regulation of sexual development of Plasmodium by translational repression.  
618       *Science* **313**, 667–669 (2006).
- 619   22. Liu, Y. *et al.* The conserved plant sterility gene HAP2 functions after attachment of fusogenic  
620       membranes in Chlamydomonas and Plasmodium gametes. *Genes Dev.* **22**, 1051–1068 (2008).
- 621   23. Moss, D. K. *et al.* Plasmodium falciparum 19-kilodalton merozoite surface protein 1 (MSP1)-  
622       specific antibodies that interfere with parasite growth in vitro can inhibit MSP1 processing,  
623       merozoite invasion, and intracellular parasite development. *Infect. Immun.* **80**, 1280–1287  
624       (2012).
- 625   24. Otto, T. D. *et al.* New insights into the blood-stage transcriptome of Plasmodium falciparum  
626       using RNA-Seq. *Mol. Microbiol.* **76**, 12–24 (2010).

- 627 25. Khan, S. M., Kroeze, H., Franke-Fayard, B. & Janse, C. J. Standardization in generating and  
628 reporting genetically modified rodent malaria parasites: the RMgmDB database. *Methods Mol.*  
629 *Biol.* **923**, 139–150 (2013).
- 630 26. Gomes, A. R. *et al.* A genome-scale vector resource enables high-throughput reverse genetic  
631 screening in a malaria parasite. *Cell Host Microbe* **17**, 404–413 (2015).
- 632 27. Talman, A. M., Blagborough, A. M. & Sinden, R. E. A *Plasmodium falciparum* strain expressing  
633 GFP throughout the parasite's life-cycle. *PLoS One* **5**, e9156 (2010).
- 634 28. Kutner, S., Breuer, W. V., Ginsburg, H., Aley, S. B. & Cabantchik, Z. I. Characterization of  
635 permeation pathways in the plasma membrane of human erythrocytes infected with early  
636 stages of *Plasmodium falciparum*: association with parasite development. *J. Cell. Physiol.* **125**,  
637 521–527 (1985).
- 638 29. Fivelman, Q. L. *et al.* Improved synchronous production of *Plasmodium falciparum* gametocytes  
639 in vitro. *Mol. Biochem. Parasitol.* **154**, 119–123 (2007).
- 640 30. Ribaut, C. *et al.* Concentration and purification by magnetic separation of the erythrocytic  
641 stages of all human *Plasmodium* species. *Malar. J.* **7**, 45 (2008).
- 642 31. Li, H. *et al.* The Sequence Alignment/Map format and SAMtools. *Bioinformatics* **25**, 2078–2079  
643 (2009).
- 644 32. Kim, D., Langmead, B. & Salzberg, S. L. HISAT: a fast spliced aligner with low memory  
645 requirements. *Nat. Methods* **12**, 357–360 (2015).
- 646 33. Fougère, A. *et al.* Variant Exported Blood-Stage Proteins Encoded by *Plasmodium* Multigene  
647 Families Are Expressed in Liver Stages Where They Are Exported into the Parasitophorous  
648 Vacuole. *PLoS Pathog.* **12**, e1005917 (2016).
- 649 34. Logan-Klumpler, F. J. *et al.* GeneDB--an annotation database for pathogens. *Nucleic Acids Res.*  
650 **40**, D98–108 (2012).
- 651 35. Anders, S., Pyl, P. T. & Huber, W. HTSeq--a Python framework to work with high-throughput  
652 sequencing data. *Bioinformatics* **31**, 166–169 (2015).



- 653 36. Quinlan, A. R. & Hall, I. M. BEDTools: a flexible suite of utilities for comparing genomic features.  
654 *Bioinformatics* **26**, 841–842 (2010).
- 655 37. Pertea, M., Kim, D., Pertea, G. M., Leek, J. T. & Salzberg, S. L. Transcript-level expression analysis  
656 of RNA-seq experiments with HISAT, StringTie and Ballgown. *Nat. Protoc.* **11**, 1650–1667 (2016).
- 657 38. McCarthy, D. J., Campbell, K. R., Lun, A. T. L. & Wills, Q. F. scater: pre-processing, quality  
658 control, normalisation and visualisation of single-cell RNA-seq data in R. *bioRxiv* 069633 (2016).  
659 doi:10.1101/069633
- 660 39. Lun, A. T. L., Bach, K. & Marioni, J. C. Pooling across cells to normalize single-cell RNA  
661 sequencing data with many zero counts. *Genome Biol.* **17**, 75 (2016).
- 662 40. Parkinson, H. *et al.* ArrayExpress--a public repository for microarray gene expression data at the  
663 EBI. *Nucleic Acids Res.* **33**, D553–5 (2005).
- 664 41. Aurrecochea, C. *et al.* EuPathDB: the eukaryotic pathogen genomics database resource.  
665 *Nucleic Acids Res.* **45**, D581–D591 (2017).
- 666 42. Lasonder, E. *et al.* Integrated transcriptomic and proteomic analyses of *P. falciparum*  
667 gametocytes: molecular insight into sex-specific processes and translational repression. *Nucleic*  
668 *Acids Res.* (2016). doi:10.1093/nar/gkw536
- 669 43. Barrett, T. *et al.* NCBI GEO: archive for functional genomics data sets--update. *Nucleic Acids Res.*  
670 **41**, D991–5 (2013).
- 671 44. Young, J. A. *et al.* The *Plasmodium falciparum* sexual development transcriptome: a microarray  
672 analysis using ontology-based pattern identification. *Mol. Biochem. Parasitol.* **143**, 67–79  
673 (2005).
- 674 45. López-Barragán, M. J. *et al.* Directional gene expression and antisense transcripts in sexual and  
675 asexual stages of *Plasmodium falciparum*. *BMC Genomics* **12**, 587 (2011).
- 676 46. Langmead, B. & Salzberg, S. L. Fast gapped-read alignment with Bowtie 2. *Nat. Methods* **9**, 357–  
677 359 (2012).
- 678 47. Roberts, A. & Pachter, L. Streaming fragment assignment for real-time analysis of sequencing

- 679 experiments. *Nat. Methods* **10**, 71–73 (2013).
- 680 48. Alexa, A., Rahnenführer, J. & Lengauer, T. Improved scoring of functional groups from gene  
681 expression data by decorrelating GO graph structure. *Bioinformatics* **22**, 1600–1607 (2006).
- 682 49. Modrzynska, K. *et al.* A Knockout Screen of ApiAP2 Genes Reveals Networks of Interacting  
683 Transcriptional Regulators Controlling the Plasmodium Life Cycle. *Cell Host Microbe* **21**, 11–22  
684 (2017).
- 685 50. McCarthy, D. J., Campbell, K. R., Lun, A. T. L. & Wills, Q. F. Scater: pre-processing, quality  
686 control, normalization and visualization of single-cell RNA-seq data in R. *Bioinformatics* (2017).  
687 doi:10.1093/bioinformatics/btw777

688  
689  
690  
691

692  
693  
694  
695  
696  
697  
698  
699  
700  
701  
702  
703  
704  
705  
706  
707  
708  
709  
710  
711  
712  
713  
714  
715  
716  
717  
718  
719  
720  
721  
722  
723

## Supplementary Material

Supplementary Figure 1. Analysis of biases in *Plasmodium berghei* mixed blood stage single-cell RNA-seq libraries.

Supplementary Figure 2. Dual sorting of two parasite species shows minimal contaminating RNA

Supplementary Figure 3. Distribution of gene counts.

Supplementary Figure 4. The same subsets of transcripts show different patterns of expression around the end of the asexual cell cycle in conventional bulk RNA-seq data and pseudotime reconstructions of single cell RNAseq data.

Supplementary Figure 5. Pseudotime reconstruction of the late asexual trajectory of *P. falciparum*.

Supplementary Figure 6. Analysis of the co-expression pattern of the ApiAP2 family of transcription factors (TFs).

Supplementary Figure 7. Principal Components Analysis and classification of *P. falciparum* gametocyte cells

Supplementary Table 1. Reagents permuted during optimisation of the single cell RNAseq protocol and stats of each treatment condition after sequencing.

Supplementary Data 1. Marker genes identifying *P. berghei* mixed stage k-means clusters

Supplementary Data 2. Highly variable genes in *P. berghei* female gametocytes, male gametocytes, trophozoites, schizonts and *P. falciparum* female gametocytes.

Supplementary Data 3. GO terms enriched amongst highly variable *P. berghei* and *P. falciparum* genes

Supplementary Data 4. *Pir* gene expression in different cell types

Supplementary Data 5. Samples sequenced in this study

Supplementary Data 6. Gene count tables for the three large datasets included in the study

## 724 Supplementary Figures

725

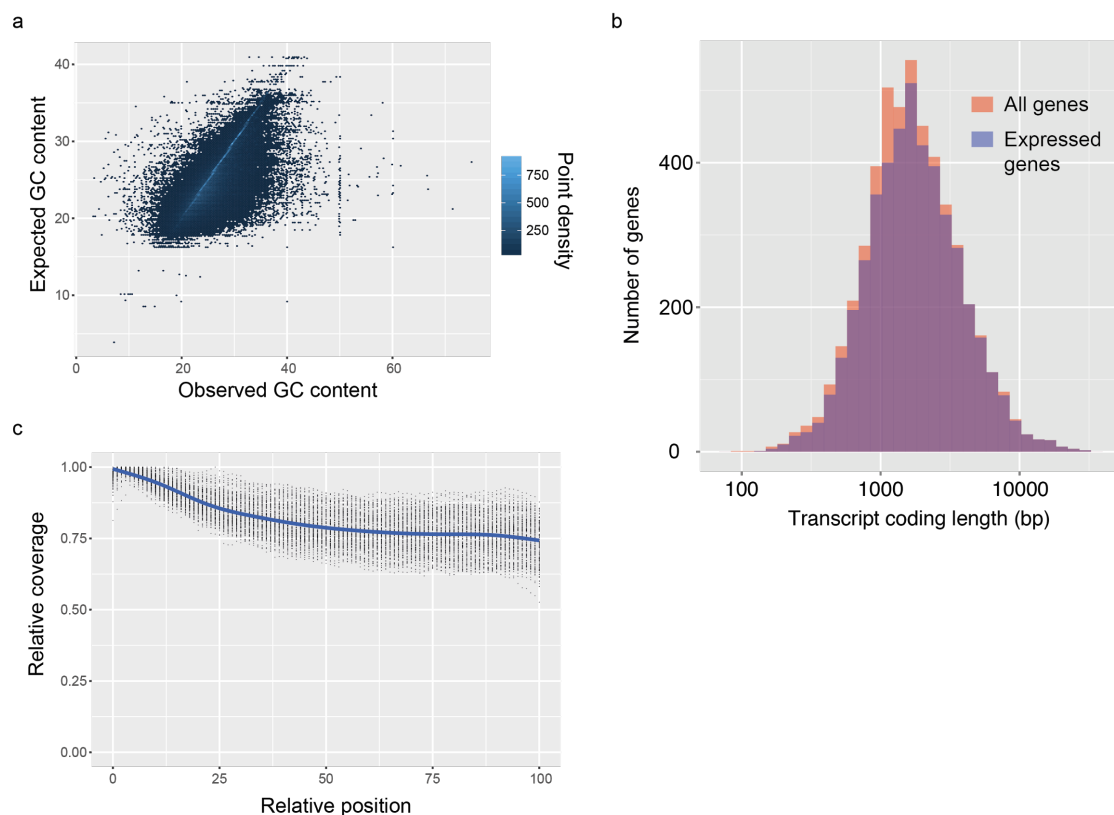

726

727

### 728 **Supplementary Figure 1. Analysis of biases in *Plasmodium berghei* mixed blood stage single-cell** 729 **RNA-seq libraries.**

730 (a) The GC content of transcript fragments agreed well with the GC content of genes. There was no  
731 apparent over- or under-representation of GC rich regions. (b) Expressed genes (those with at least  
732 10 reads in at least 5 cells) were representative of average gene length, suggesting that although the  
733 reverse transcriptase might not copy the whole of long transcripts, fragments of long genes are still  
734 detected. (c) Sequencing library preparation often introduces end bias, where either the 5' or 3' end  
735 of transcripts tend to be better covered. Our protocol introduced a small 5'-bias, which could be  
736 attributable to the reverse transcription sometimes initiating within transcripts in internal polyA  
737 regions, rather than in the 3' poly-A tail.

738

739

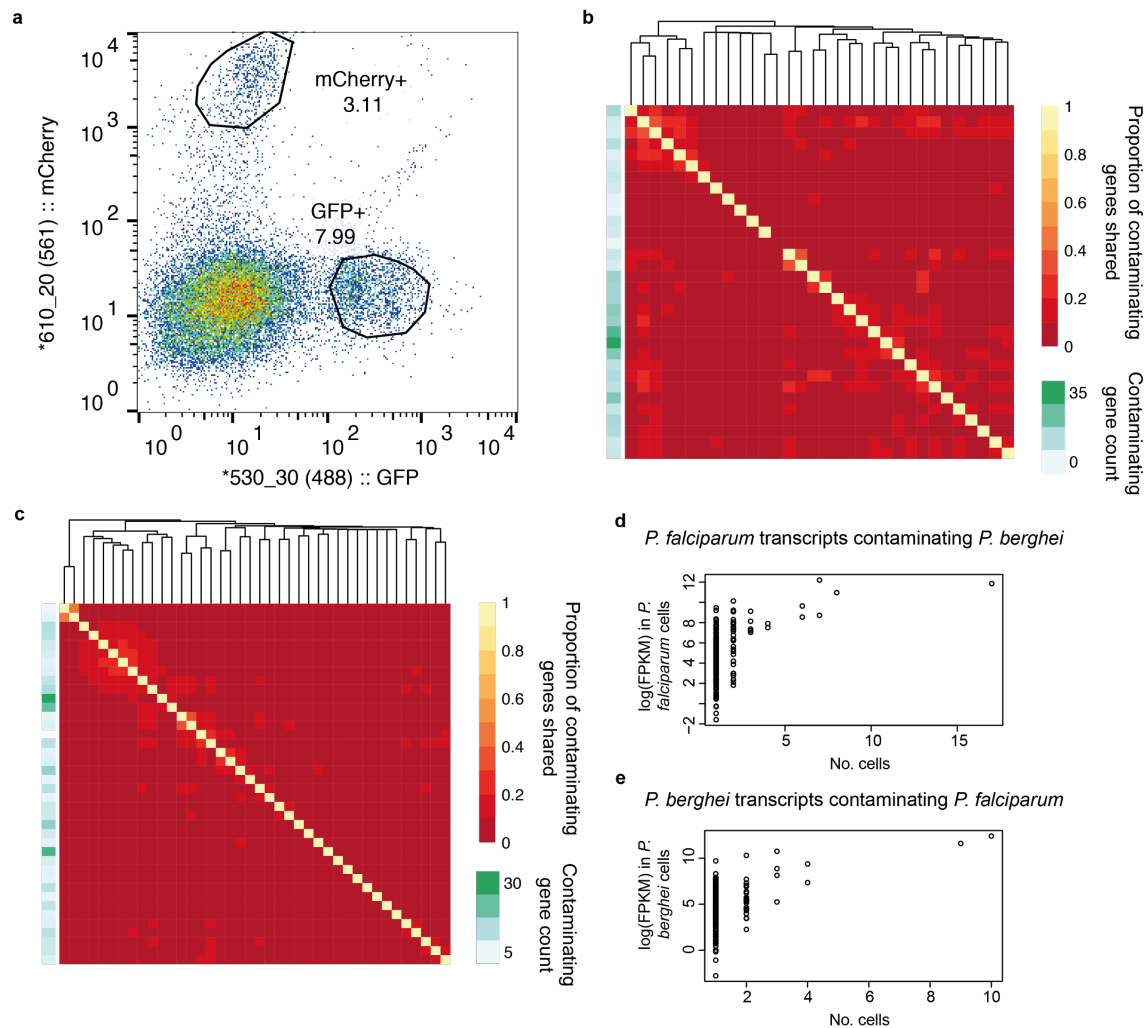

740  
 741 **Supplementary Figure 2. Dual sorting of two parasite species shows minimal contaminating**  
 742 **RNA** (a) Purified asexual late blood stage of GFP *P. falciparum* and mCherry *P. berghei* were mixed at  
 743 a 1:1 ratio, inactivated in RNALater, and sorted individually by flow cytometry, gated on respective  
 744 fluorescent channels. The proportion of shared contaminating transcripts between pairs of cells was  
 745 low for *P. falciparum* transcripts in *P. berghei* cells (b) and even lower for *P. berghei* transcripts in *P.*  
 746 *falciparum* cells (c). Overall there were 273 unique *P. falciparum* transcripts contaminating the *P.*  
 747 *berghei* transcriptomes, although no cell had more than 37 contaminating transcripts and no pair of  
 748 cells shared more than 17. There was a total of 258 *P. berghei* transcripts contaminating *P.*  
 749 *falciparum* transcriptomes, although no cell had more than 32 of these and no pair of cells shared  
 750 more than 10. The data suggest that *P. falciparum* schizonts cause more contamination than *P.*  
 751 *berghei* schizonts. More commonly occurring, contaminating transcripts are more highly expressed  
 752 in their cells of origin for both *P. falciparum* transcripts contaminating *P. berghei* cells (d) and *P.*  
 753 *berghei* transcripts contaminating *P. falciparum* cells (e). This suggests that contaminants reflect the  
 754 observed pool of transcripts.  
 755

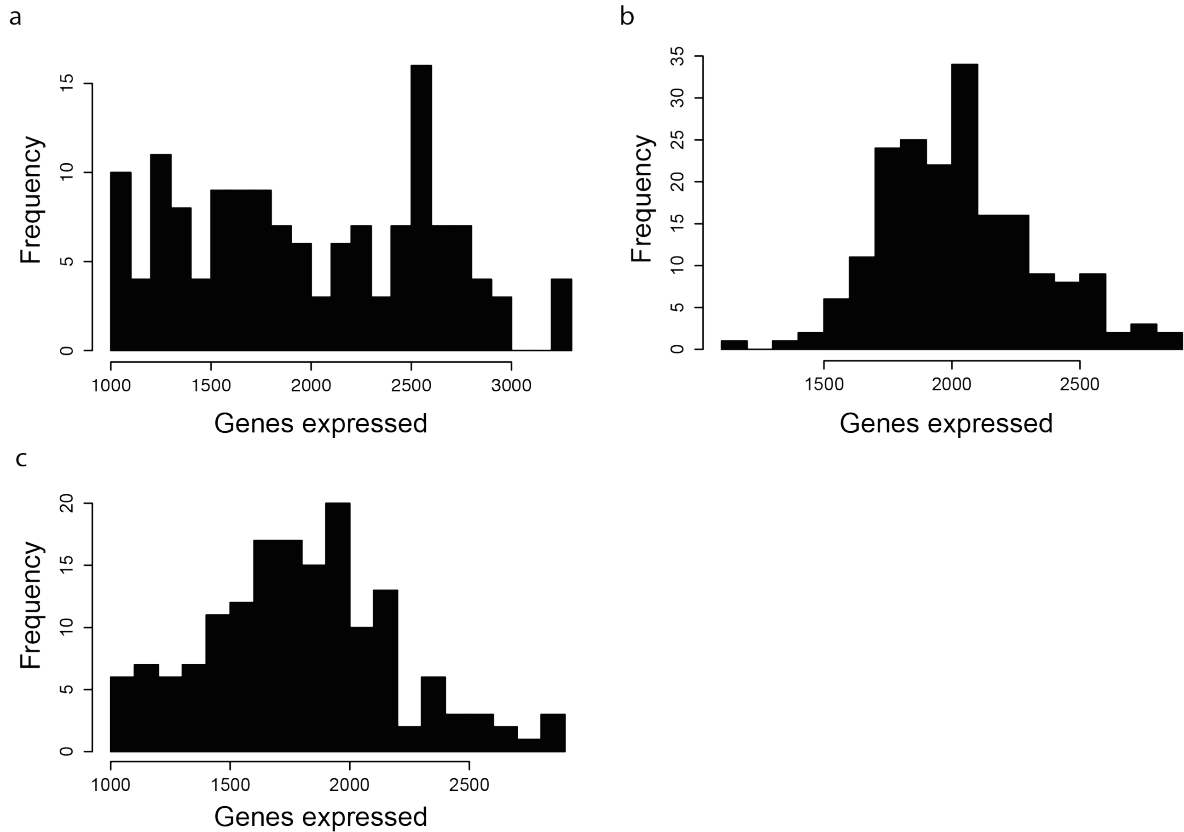

756

757

758 **Supplementary Figure 3. Distribution of gene counts.**

759 Histograms of expressed gene number after filtering for (a) 144 *P. berghei* mixed blood stage cells,

760 (b) 191 *P. falciparum* gametocytes and (c) 161 *P. falciparum* asexual cells. The greater distribution of

761 gene counts in *P. berghei* is due to the greater variety of cell types in this dataset. Female

762 gametocytes for instance, consistently had a greater number of genes expressed.

763

764

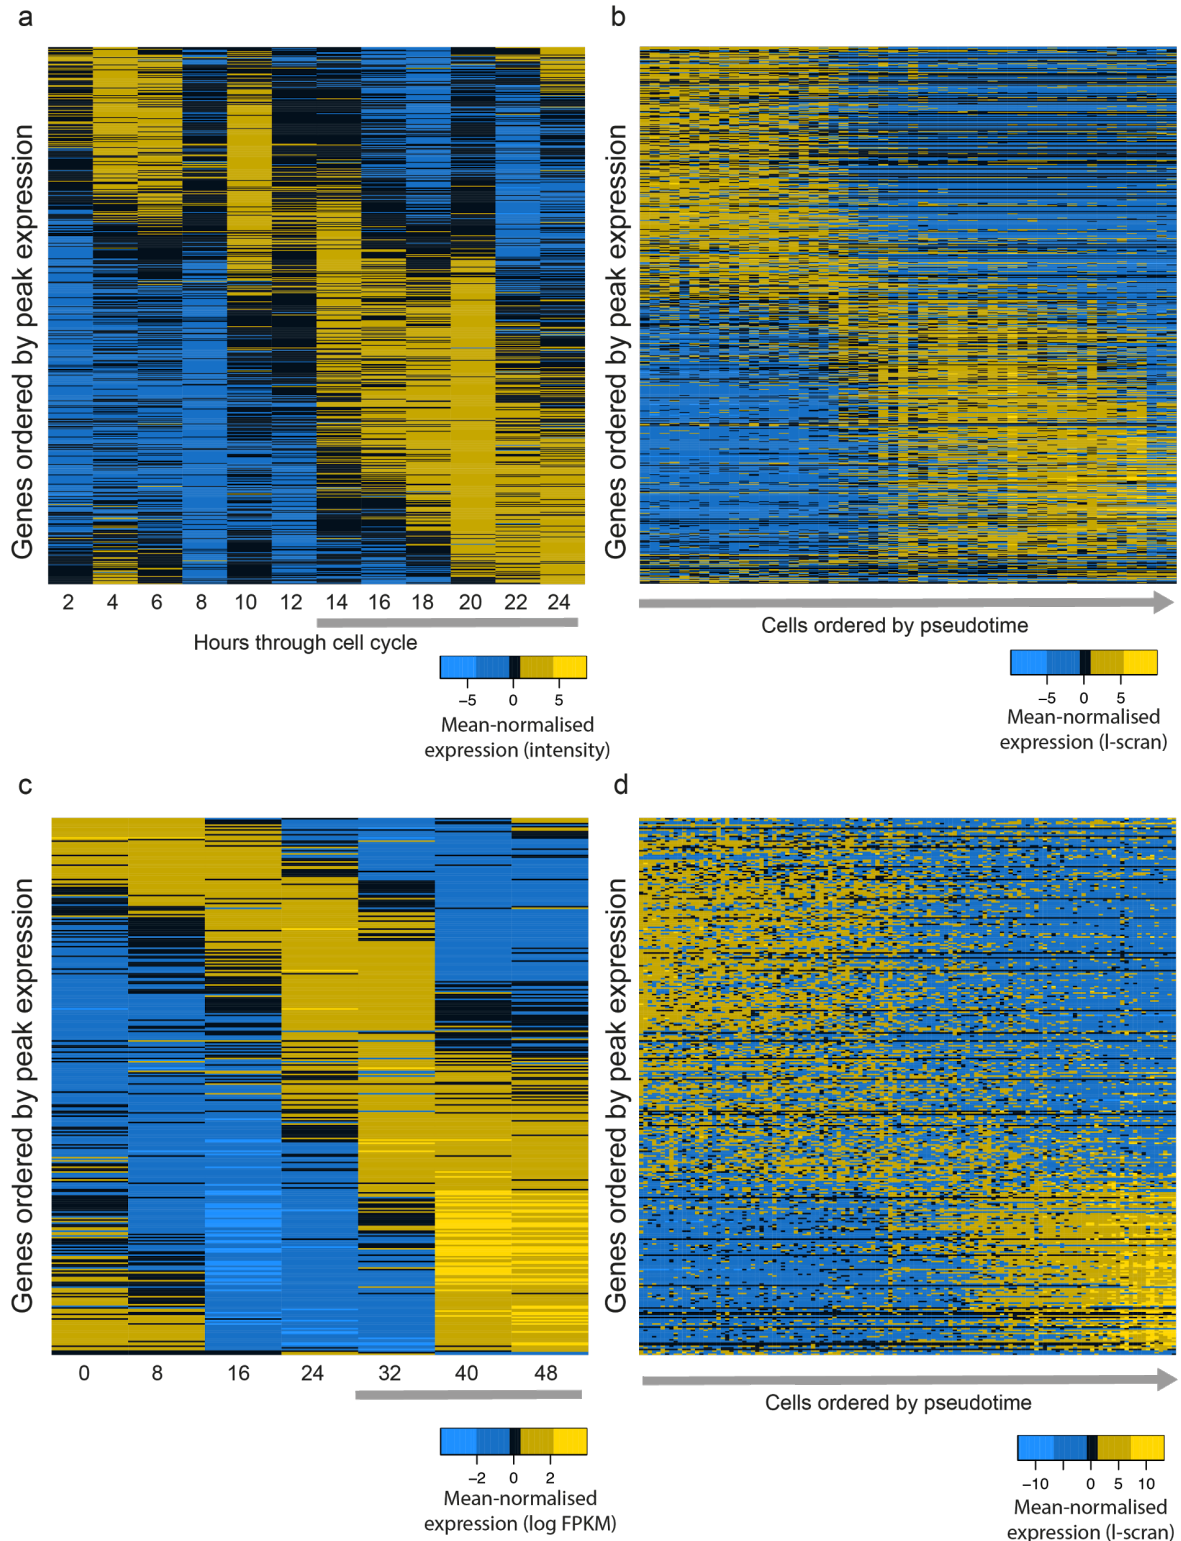

765  
766  
767  
768  
769  
770

**Supplementary Figure 4. The same subsets of transcripts show different patterns of expression around the end of the asexual cell cycle in conventional bulk RNA-seq data and pseudotime reconstructions of single cell RNAseq data.**



771 A shared set of 651 genes identified as following a sigmoidal expression pattern through the  
772 intraerythrocytic developmental cycle (see Methods) are shown in both bulk transcriptome data <sup>11</sup>  
773 **(a)** and single cell data ordered by pseudotime **(b)** for *P. berghei*. A much more dramatic shift in gene  
774 expression is observed in the single-cell transcriptome data. A similar pattern is observed between *P.*  
775 *falciparum* bulk <sup>24</sup> **(c)** and single cell **(d)** RNA-seq. In panels b and d, gene expression patterns are  
776 mean-normalised I-scran values. Only late stage parasites (grey bars in bulk reference datasets) are  
777 expected to be present in the single cell datasets.

778

779

780

781

782

783

784

785

786

787

788

789

790

791

792

793

794

795

796

797

798

799

800

801

802

803

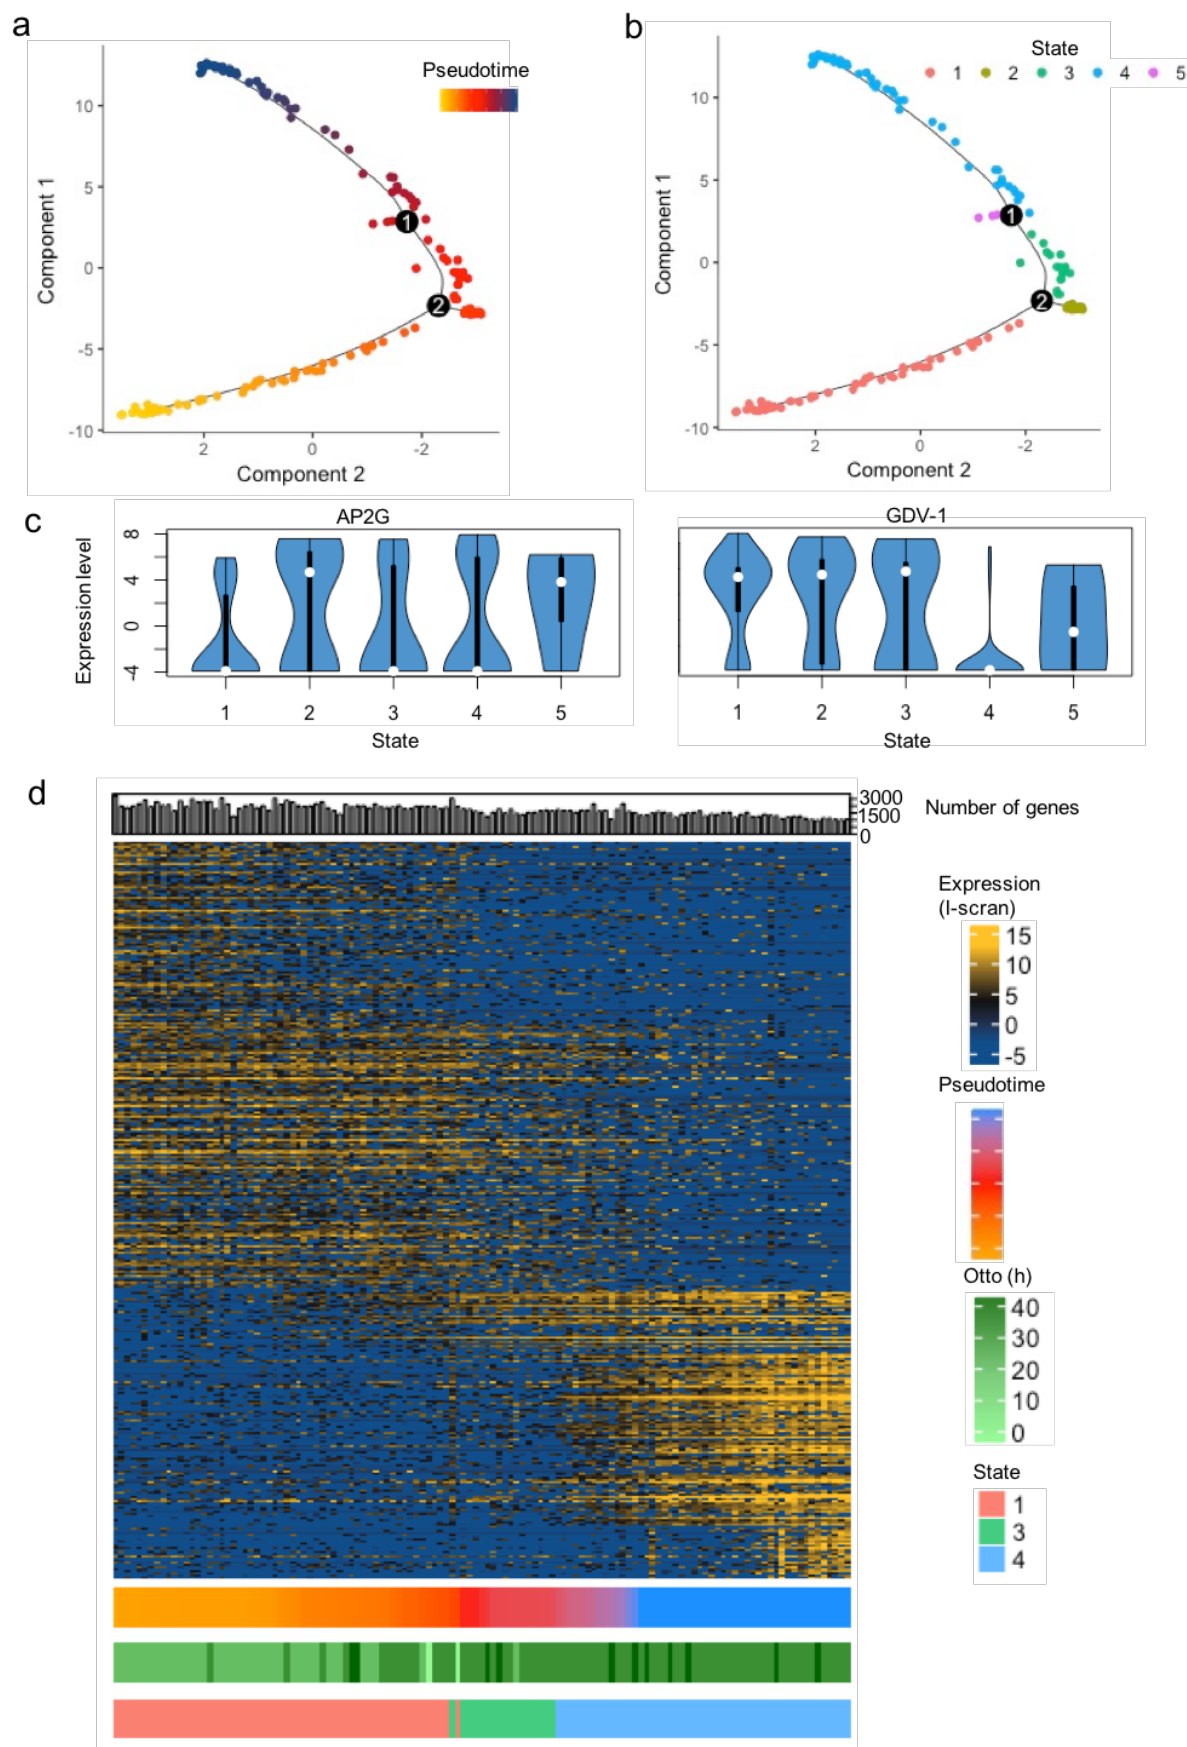

804

805 **Supplementary Figure 5. Pseudotime reconstruction of the late asexual trajectory of *P. falciparum*.**

806 PCA of 155 *P. falciparum* cells colored by pseudotime (**a**) or Monocle state (**b**); identified trajectory  
807 branches are displayed as circled number 1 and 2. (**c**) Expression of sexual commitment markers  
808 *ap2-g* (PF3D7\_1222600) and *gdv-1* (PF3D7\_0935400) in cells of different states. (**d**) Differentially  
809 expressed genes were plotted along pseudotime for cells in the main trajectory (States 1, 3 and 4).  
810 The number of genes per cell is displayed on top of the heat map, whilst the pseudotime, the  
811 maturation prediction<sup>24</sup> and the cell state are displayed on the side of the heatmap. The transition  
812 between trophozoites and schizonts is associated with a hard transcriptional shift, as seen for *P.*  
813 *berghei* (Fig. 2d).

814

815

816

817

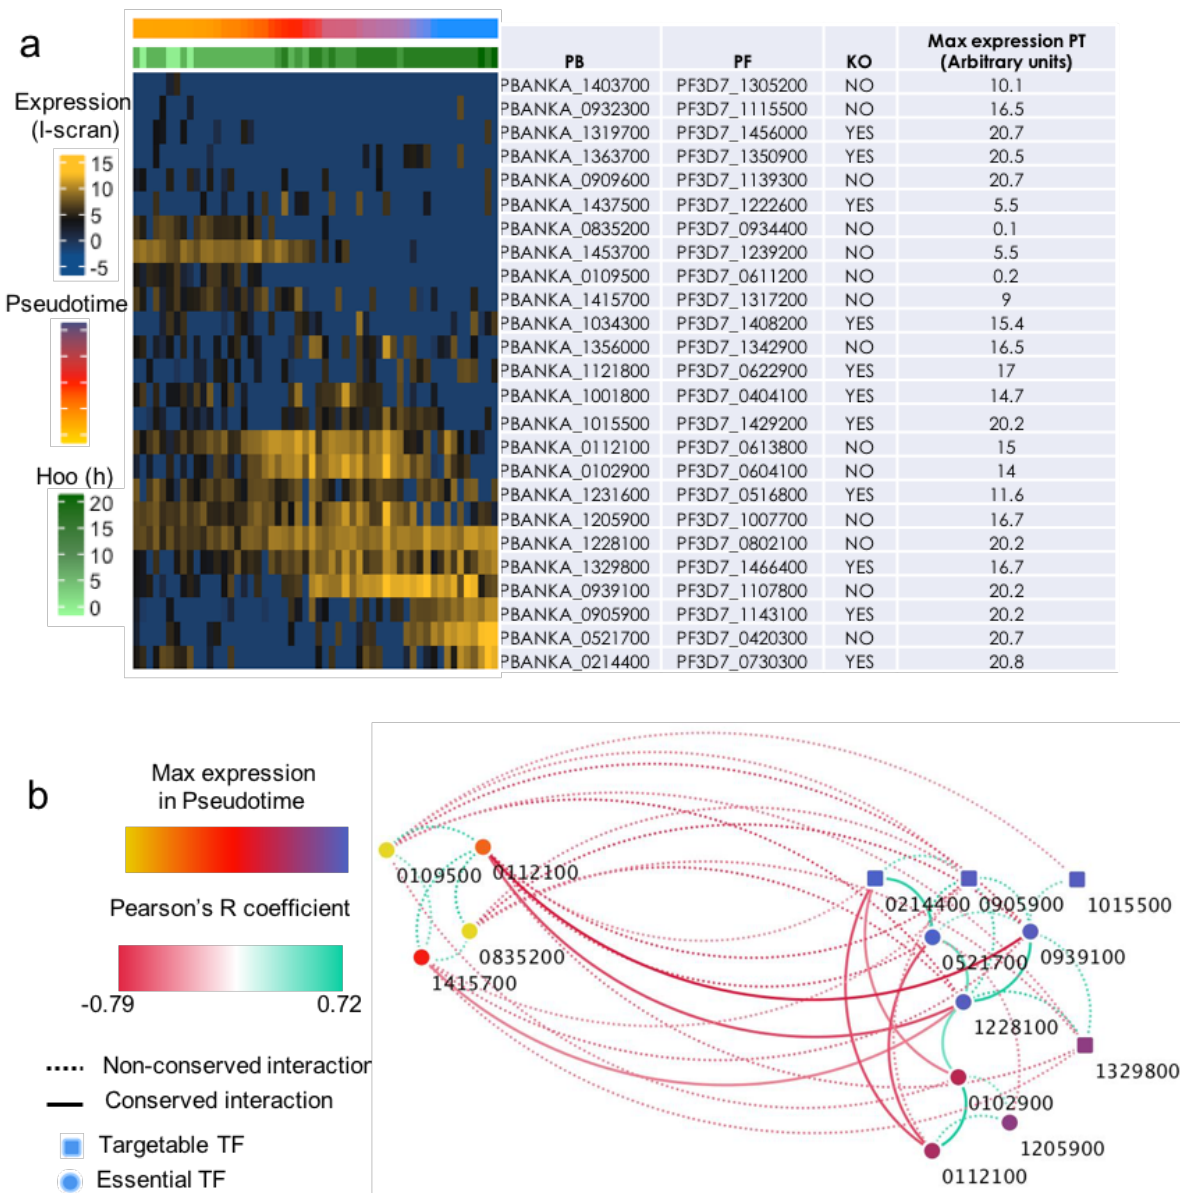

818

819 **Supplementary Figure 6. Analysis of the co-expression pattern of the ApiAP2 family of**

820 **transcription factors (TFs).**

821 (a) Expression of *P. berghei* ApiAP2 genes in pseudotime. The *P. falciparum* ortholog is indicated

822 (PF), as well as its established or custom short name (Pb), it's peak pseudotime expression (Max

823 expression PT) and the ability to disrupt the TF as observed in a recent genetic screen (KO)<sup>49</sup>. (b) A

824 network analysis was conducted using significant positive and negative interactions ( $p < 0.05$  by

825 Pearson's correlation) of 25 different TFs and weighted according to their Pearson correlation

826 coefficient. A similar analysis in *P. falciparum* revealed that some of these co-expression interactions

827 are conserved within the genus (solid lines). Maximum TF expression along pseudotime appears to

828 be important to the structure of the network, strongly suggesting a coordinated regulation cascade

829 of different members of the family during the trophozoite to schizont transition.

830  
831  
832

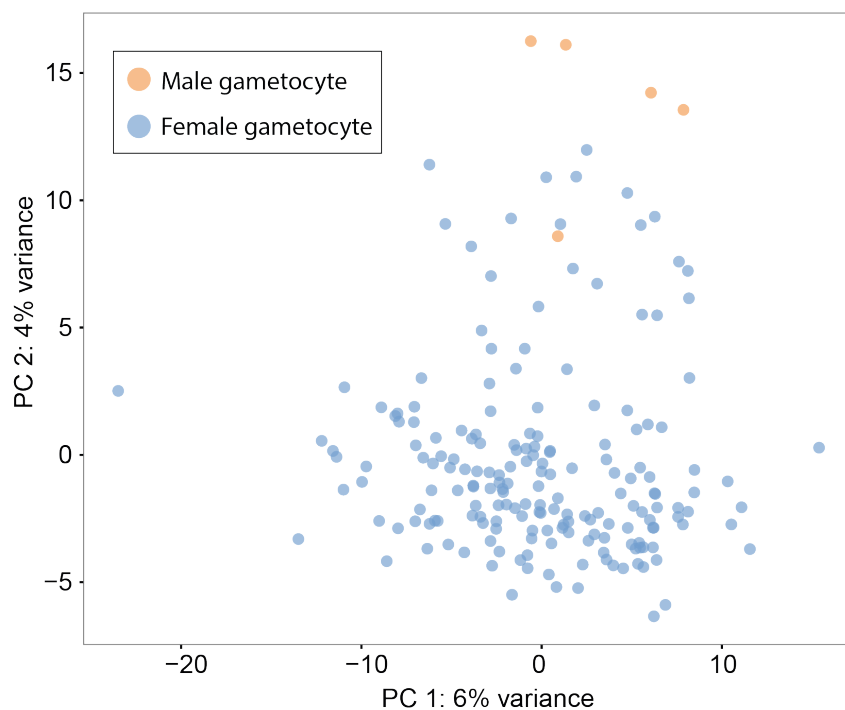

833  
834

835 **Supplementary Figure 7. Principal Components Analysis and classification of *P. falciparum***  
836 **gametocyte cells**

837 A combination of Principal Components Analysis (PCA), k-means clustering and comparison to bulk  
838 RNA-seq datasets was used to classify 191 high quality *P. falciparum* gametocytes. A consensus of  
839 clustering and comparison to bulk RNA-seq allowed us to distinguish male gametocytes and female  
840 gametocytes.

841

842  
843

844  
845  
846

## Supplementary Tables/Data

| Conditions tested          | Protocol                               | SSII, V30, 30 cycles | SSII, T30, 30 cycles | SmSc, T30, 30 cycles | SSII, T30, 25 cycles | SmSc, T30, 25 cycles | SmSc, T30, 25 cycles | SmSc, T30, 25 cycles | SmSc, T30, 25 cycles |
|----------------------------|----------------------------------------|----------------------|----------------------|----------------------|----------------------|----------------------|----------------------|----------------------|----------------------|
|                            | Cells                                  | Sexual               | Asexual              | Asexual              | Asexual              | Asexual              | Sexual               | Mixed blood          | Asexual              |
|                            | Species                                | Pf                   | Pf                   | Pf                   | Pf                   | Pf                   | Pf                   | Pb                   | Pf                   |
| Lysis buffer volume        | 2 $\mu$ l                              | ✓                    |                      |                      |                      |                      |                      |                      |                      |
|                            | 4 $\mu$ l                              |                      | ✓                    | ✓                    | ✓                    | ✓                    | ✓                    | ✓                    | ✓                    |
| Oligo Dt (IDT)             | Anchored 30 bp                         | ✓                    |                      |                      |                      |                      |                      |                      |                      |
|                            | Non-Anchored 30 bp                     |                      | ✓                    | ✓                    | ✓                    | ✓                    | ✓                    | ✓                    | ✓                    |
| Reverse transcriptase      | Superscript II (Life Technologies) 10U | ✓                    | ✓                    |                      | ✓                    |                      |                      |                      |                      |
|                            | Smartscribe (Clontech) 5U              |                      |                      | ✓                    |                      | ✓                    | ✓                    | ✓                    | ✓                    |
| Cycle number               | 25                                     |                      |                      |                      | ✓                    | ✓                    | ✓                    | ✓                    | ✓                    |
|                            | 30                                     | ✓                    | ✓                    | ✓                    |                      |                      |                      |                      |                      |
| Sequencing machine         | HiSeq                                  |                      |                      |                      |                      |                      | ✓                    | ✓                    | ✓                    |
|                            | MiSeq                                  | ✓                    | ✓                    | ✓                    | ✓                    | ✓                    |                      |                      |                      |
| Sequencing results summary | % rRNA                                 | 5.7                  | 33.5                 | 36.2                 | 6.4                  | 18.4                 | 17.8                 | 16.7                 | 34.8                 |
|                            | % coding genes                         | 4.4                  | 11.3                 | 39.3                 | 10.5                 | 33                   | 51.7                 | 49                   | 40.5                 |
|                            | % other                                | 90                   | 55.2                 | 24.4                 | 83.1                 | 48.6                 | 30.5                 | 34.2                 | 24.6                 |
|                            | Median genes detected for 50k reads    | 25                   | 84                   | 145                  | 174                  | 181                  | 502.5                | NA                   | NA                   |
|                            | Total cells                            | 5                    | 6                    | 6                    | 6                    | 6                    | 237                  | 182                  | 174                  |
|                            | Cells passing filters                  | NA                   | NA                   | NA                   | NA                   | NA                   | 191                  | 144                  | 161                  |
|                            | Median gene count                      | NA                   | NA                   | NA                   | NA                   | NA                   | 2011                 | 1922.5               | 1793                 |

847  
848  
849  
850  
851  
852  
853  
854  
855  
856  
857  
858  
859  
860  
861  
862  
863  
864  
865  
866  
867

### Supplementary Table 1. Reagents permuted during optimisation of the single cell RNAseq protocol and stats of each treatment condition after sequencing.

Different combinations of the protocol were tested by sequencing. Initial trials were performed with 2  $\mu$ l of lysis buffer, this was increased to 4 $\mu$ l to augment capture efficiency. Permutations of the protocol that were tested were a terminal anchoring base (A,G,C; **V**) or not (**T**), 2 reverse transcriptase enzymes (Smartscribe (SmSc); Superscript II (SII)) and 25 or 30 cycles of preamplification. Both sexual and asexual cells of *P. berghei* and *P. falciparum* were tested. For each sequenced dataset, we calculated the mean percentages of rRNA, mRNA and other reads across the cells. For some samples we also downsampled the data to 50,000 reads per cell to allow comparison of the number of genes detected. This was done to determine differences in the complexity of each library. For the three larger datasets produced (*P. falciparum* gametocytes, *P. berghei* mixed blood stages, and *P. falciparum* asexual stages), we provide the numbers of pre- and post-filtered cells and median number of genes in those filtered cells.

868 **Supplementary Data 1. Marker genes identifying *P. berghei* mixed stage k-means clusters**

869 Marker genes are those for which expression is reliably associated with a particular cluster. They  
870 were identified for clusters in the k = 3 means clustering of *P. berghei* mixed blood stages using the  
871 *markers* function of the SC3 package. Cluster 1 corresponds to asexuals, cluster 2 to males and  
872 cluster 3 to females. The majority consensus is the cell type most common in that cluster. However,  
873 the only alternative cells in these clusters are the small number of outliers. AUROC is the Area Under  
874 the Receiver Operating Characteristics curve and is a measure of the reliability of the marker. We  
875 used an AUROC cut off of 0.85 and a *p*-value cut off of 0.01.

876 See Excel file “Supplementary Data 1.xls”

877

878 **Supplementary Data 2. Highly variable genes in *P. berghei* female gametocytes, male gametocytes,  
879 trophozoites, schizonts and *P. falciparum* female gametocytes.** The *p* and *q* (corrected) values given  
880 for each gene are those determined using M3Drop.

881 See Excel file “Supplementary Data 2.xls”

882

883 **Supplementary Data 3. Gene Ontology terms enriched amongst highly variable *P. berghei* and *P.*  
884 *falciparum* genes.**

885 Enriched GO terms were determined using topGO. The total terms are those in the whole set of  
886 transcripts and multiple-hypothesis testing corrected significance values (*q* values) are shown.

887 See Excel file “Supplementary data 3.xls”

888

889 **Supplementary Data 4. *Pir* gene expression in different *P. berghei* cell types**

890 *Pir* gene expression values for *P. berghei* mixed blood stages are shown, relating to Figure 3a.

891 Expression is measured by length normalised scran, or l-scran values.

892 See Excel file “Supplementary Data 4.xls”

893

894 **Supplementary Data 5. Samples sequenced in this study**

895 A full list of the samples related to this study is presented, linking the data we present to sequence  
896 data identifiers used by the European Nucleotide Archive (*sanger\_sample\_id*). Type: SC = single cell,  
897 Hcell = 100 cells, NoCell = no cell control. Run = internal Illumina run number. Lane = Illumina lane  
898 number. Tag = Internal Nextera barcode number. *is\_control* = is the sample a control sample?  
899 *pass\_filter* = did the sample pass our filtering criteria. *consensus* = consensus annotation for that  
900 cell. For *P. berghei* mixed blood stages: *sc3\_k4* = cluster identifier for k means clustering (k=4),  
901 *sc3\_k3* = cluster identifier for k means clustering (k=3), *hoo* = best matching sample from Hoo *et al.*<sup>11</sup>



902 bulk microarray dataset of cell cycle, otto = best matching sample from Otto *et al.*<sup>12</sup> bulk RNA-seq  
903 dataset of life cycle stages. For *P. falciparum*: sc3\_female\_k3 = cluster identifier for k means  
904 clustering of female-only samples (k=3), lasonder = best matching samples from<sup>42</sup> bulk RNA-seq  
905 dataset of male and female parasites, young = best matching samples from Young *et al.* bulk  
906 microarray dataset<sup>44</sup> of gametocyte development. For *P. falciparum* asexual stages, lopez = best  
907 matching sample from Lopez-Barragnan *et al.*<sup>45</sup>, otto = best matching sample from Otto *et al.*<sup>24</sup> and  
908 pseudotime\_state = pseudotime state, where states 2 and 5 were filtered out.

909 See Excel file "Supplementary Data 5.xls"

910

911 **Supplementary Data 6. Gene counts for the datasets included in the study**

912 Gene counts for all cells (included those we failed) for the *P. berghei* mixed blood stages, the *P.*  
913 *falciparum* gametocytes, and the *P. falciparum* asexuals are presented here. These data, along with  
914 the corresponding metadata in Supplementary Data 5 can be used to replicate and/or extend our  
915 analysis using, for instance, the *scater* package<sup>50</sup>.

916 See Excel file "Supplementary Data 6.xls"
